1                                   Uncertainty and precaution in hunting wolves twice in a year

2

3   Adrian Treves<sup>1\*</sup>, Naomi X. Louchouarn<sup>1</sup>

4

5

6

7

8   <sup>1</sup> Nelson Institute for Environmental Studies, University of Wisconsin, Madison, Wisconsin,

9   United States of America

10   \* Corresponding Author:

11   Email: [atreves@wisc.edu](mailto:atreves@wisc.edu) (AT)

12

13

## 14 Abstract

15 When humanity confronts the risk of extinction of species, many people invoke precautions,  
16 especially in the face of uncertainty. Although precautionary approaches are value judgments,  
17 the optimal design and effect of precautions or lack thereof are scientific questions. We  
18 investigated Wisconsin gray wolves *Canis lupus* facing a second wolf-hunt in November 2021  
19 and use three legal thresholds as the societal value judgments about precautions: (1) the 1999  
20 population goal, 350 wolves, (2) the threshold for statutory listing under the state threatened  
21 and endangered species act, 250 wolves; and (3) state extirpation <2 wolves. This allows us to  
22 explore the quantitative relationship between precaution and uncertainty. Working from  
23 estimates of the size wolf population in April 2021 and reproduction to November, we  
24 constructed a simple linear model with uninformative priors for the period April 2021-April  
25 2022 including an uncertain wolf-hunt in November 2021. Our first result is that the state  
26 government under-counted wolf deaths in the year preceding both wolf-hunts. We recommend  
27 better scientific analysis be used when setting wolf-hunt quotas. We find official  
28 recommendations for a quota for the November 2021 wolf-hunt risk undesirable outcomes.  
29 Even a quota of zero has a 13% chance of crossing threshold 1. Therefore, a zero death toll  
30 would be precautionary. Proponents for high quotas bear the burden of proof that their  
31 estimates are accurate, precise, and reproducible. We discuss why our approach is transferable  
32 to non-wolves. We show how scientists have the tools and concepts for quantifying and  
33 explaining the probabilities of crossing thresholds set by laws or other social norms. We  
34 recommend that scientists grapple with data gaps by explaining what the uncertainty means for  
35 policy and the public including the consequences of being wrong.

36 Short title: Uncertainty and precaution

37 Keywords: Canis lupus, endangered species, extinction, hunt, model, sustainability, policy,  
38 wildlife populations

39

## 40 Introduction

41 When humanity confronts threats to the planetary or local natural resources and  
42 biodiversity, many governments, critics, and commentators invoke precautions. For example, in  
43 1992, United Nations authors endorsed a precautionary principle as follows,

44 “In order to protect the environment, the precautionary approach shall be widely  
45 applied by States according to their capabilities. Where there are threats of serious or  
46 irreversible damage, lack of full scientific certainty shall not be used as a reason for  
47 postponing cost-effective measures to prevent environmental degradation.” (Principle  
48 15 of [1]).

## 49 Precaution

50 The precautionary principle can be a double-edged sword. For many fields harm can arise from  
51 action or inaction, so the task of implementing precautions is not always obvious. For many  
52 practitioners debating whether to intervene in human poverty or illness, inaction can kill.  
53 Therefore, the harm and the precaution are not necessarily obvious. (For a full treatment of the  
54 precautionary principle or approach in fields from civil engineering to medicine, we recommend  
55 this article [2]). Where poverty or illness are the major killers, technological and medical  
56 interventions that alleviate these ills can save lives, and therefore, inaction can perpetuate

57 harm. The precautionary principle seems to us more straightforward to apply when the  
58 potential harm is extinction.

59         There is no scientific uncertainty that human activities that directly kill organisms or  
60 degrade ecosystems have caused extinctions. The risk of extinction whether local or range-wide  
61 is higher for organisms that are few in number, or abundant ones that are narrowly endemic or  
62 genetically homogeneous [3]. For simplicity, we refer to the latter as listed hereafter.  
63 Precautions for imperiled species received affirmation by the 1978 USA Supreme Court decision  
64 on the snail darter threatened by Tellico Dam [4]: “The Supreme Court's opinion in TVA v Hill is  
65 still good law, with Chief Justice Burger's stentorian declaration repeatedly echoed in successive  
66 endangered species cases: ‘Congress has spoken in the plainest of words, making it abundantly  
67 clear that the balance has been struck in favor of affording endangered species the highest of  
68 priorities, thereby adopting a policy which it described as **Institutionalized caution.**’ ” p.305,  
69 emphasis added [5], citing majority opinion [4]; see also [6]. For example, under Endangered  
70 Species Act (ESA) protections and similar provisions of the E.U. Habitats Directive [7-9], permits  
71 for killing listed species are extremely restrictive.

72         Following efforts to reduce protections for gray wolves *Canis lupus* in the USA and E.U.,  
73 much attention has been paid to proposed and enacted regulations and methods for public  
74 hunting, trapping, and hounding of wolves [10-20]. For wolves in the USA, a recently listed  
75 population reclassified from ESA endangered status in early January 2021, but whose  
76 reclassification is a matter of litigation as we write [21], similar institutionalized caution might  
77 still be appropriate. For example, in the wake of USA federal de-listing, the state of Wisconsin  
78 held a wolf-hunt in February 2021 during which permitted hunters killed at least 21% of the

79 population in <72 hours [22]; another 98-105 wolves were estimated to have died (from  
80 poaching mainly) because of removal of federal protections between 3 November 2020-14 April  
81 2021; and apparently at least a third of collared wolves went off the air without explanation  
82 [23, 24]. A March 2021 proposal to hunt Wisconsin wolves again starting 6 November 2021 has  
83 raised public concerns and state wildlife agency cautions to decision-makers [25].

84         Here we present the second in a series examining the effects of wolf-hunting on  
85 Wisconsin's wolf population [23] by forecasting the status of the population out to 14 April  
86 2022, with and without permitted killing at various levels. To operationalize precaution without  
87 interposing our own values, we defined the result of wolf-hunting by the state of Wisconsin as  
88 eradication (<2 wolves), statutory listing under the state threatened and endangered species  
89 list (<251 wolves), and falling below the state population goal of 350 wolves [26]; all those  
90 values exclude wolves ranging across tribal reservations estimated at 42 wolves [27]. These  
91 three thresholds represent the value judgments made by society at one time or another, in  
92 principle, statute, and regulation respectively, about how cautious one should be about the  
93 status of the state wolf population. We are not interposing our own value judgment about a  
94 desirable or undesirable number of wolves. Instead, we ask the scientific question of what  
95 death toll in Fall 2021 would cross undesirable thresholds set by existing regulatory  
96 mechanisms, so the public and decision-makers can judge caution and its absence.

97         Scrutiny of this case allows both a qualitative and a quantitative analysis of uncertainty  
98 in the presence or absence of institutionalized caution. Our interest in scrutinizing these plans is  
99 not ours alone. The federal legal mandate is 5 years of monitoring and possible emergency  
100 relisting under the ESA if the threats to wolves resurface strongly [28]. Given that the state

101 wildlife agency expects serious federal scrutiny if the state population is reduced by 25% and  
102 recommended a lower quota of wolf-kills preceding both wolf-hunts than was set by the  
103 Natural Resource Board, NRB [25] and given co-sovereign tribes in the region have expressed  
104 strong concerns [29], scrutiny of the plans for a second wolf-hunt seems important to many  
105 actors. Relatedly, concerns have been expressed by scientists and managers about ‘political  
106 populations’ defined as wildlife whose population parameters are set by political pressures  
107 despite being biologically unrealistic [30]. Scientific work that can bridge between biological (or  
108 social scientific) observations on the one hand, and management or policy-making on the other  
109 hand, may help to minimize undue political pressure. Scientific scrutiny also presents a case  
110 study of the precautionary principle in the design of sustainable natural resource use.

## 111 **Uncertainty**

112         The U.N. precautionary principle 15 above calls for reducing scientific uncertainty.  
113 Likewise, an early amendment to the USA ESA sought to base decisions solely on “the best  
114 available scientific and commercial data”, BAS [5]. Those principles identify scientific certainty  
115 and uncertainty as crucial fulcrums for decisions with more deliberation and less action the  
116 more uncertain we are.

117         When precautionary approaches are reduced to a question of certainty about harms,  
118 policy-makers face a dilemma well summed up in this quotation, “The very basis of the  
119 Precautionary Principle is to imagine the worst **without supporting evidence**... those with the  
120 darkest imaginations become the most influential.” emphasis added, [31]. To avoid that pitfall  
121 which afflicts extreme positions in the wolf-hunting debate, we do not imagine the darkest  
122 future but rather stick to peer-reviewed data and, where that is absent, restrict ourselves to the

123 official state data, rely on peer-reviewed evidence when it conflicts with the state's assertions  
124 of fact, and explain the limits to confidence with both.

125         The uncertainties in our case are not limited to scientific data or how to interpret those.  
126 The uncertainties extend to the political actors and decision-makers. Powerful actors differ on  
127 the ideal number of wolves dead or alive and competing views of what makes for the best  
128 available science. The socio-political context of the Wisconsin wolf debate includes multiple  
129 governmental entities, each one with a different worldview and each one able to act  
130 (subsequent to our writing) in ways we cannot anticipate. Given these actors differ in their  
131 institutionalized caution and in how individuals are given authority to use personal opinion  
132 about caution, our three above-mentioned thresholds (eradication, listing level, and population  
133 goal) serve as legal value judgments about precautions. Hence, the legal thresholds provide the  
134 basis we use to account for uncertainty.

135         Uncertainty also characterizes the scientific literature on human-induced mortality  
136 patterns among wolves. We do not spend much effort to address sustainability for two simple  
137 reasons. First, concerns with sustainability are about future uses more than the risk of  
138 extirpation after a single use and we are concerned with crossing the above thresholds in the  
139 2021-2022 wolf-hunting season. Second, the science of sustainable hunting of wolves is  
140 unsettled. Although reviews of wolf population dynamics and sustainable levels of killing  
141 include many data points and seem to converge on a range of sustainable, annual human-  
142 caused mortality rates [32-36], the literature nonetheless concludes with three-fold differences  
143 in magnitude for estimates ranging from high teens to 48%. Although the prior literature would  
144 seem to guide decision-makers in Wisconsin to choose a Fall 2021 wolfs-hunt quota that would

145 not change the population, the wide variation in estimates above and the novelty of a second  
146 wolf-hunt in a single year produces new and greater uncertainties than the literature addresses.  
147 Also, in a series of papers on wolf science and policy in Wisconsin, we have shown how  
148 omissions of a history of methodological changes in censuses, censoring the information  
149 available in the disappearances of marked wolves, and a lack of alternative management  
150 scenarios altogether could both distort wolf policy and mire the science in uncertainties due to  
151 methods [23, 33, 37-46].

152         To support decision-making in the face of great uncertainty, we provide a step-by-step  
153 rationale for the uniform distributions we use and a simple linear model of births and deaths.  
154 The primary reason to take this simple approach is its practical advantage. We show how the  
155 state, tribes, public, and other interests can perform these estimates independently and  
156 reproduce our findings to explore their own scenarios for November death tolls. That is  
157 valuable given our inability to predict the eventual death toll and the reactions of the many  
158 interested governmental actors mentioned above. Thus, as we grapple with uncertainty at  
159 every step, we transparently present the bounds we consider plausible and why. Secondly, we  
160 use Bayesian concepts and terminology but not formal Bayesian algorithms, because many of  
161 our key input variables are uninformative and combine in simple linear fashion. To achieve our  
162 primary goal of clear communication and user-input, a formal Bayesian algorithm would be less  
163 accessible. We illustrate how any reader and user of our simple model can choose a death toll  
164 and calculate probabilities of crossing the legal thresholds. We offer this simple approach as a  
165 possible model for other scientists engaged in public policy debates whether or not contentious  
166 and uncertain, beyond wolves, and beyond North American hunting systems.



## 167 Materials & Methods

168 Our study period is the wolf-year starting 15 April 2021 and ending 14 April 2022. We  
169 contended with three key scientific uncertainties in this study period. First, the effects of the  
170 22-24 February wolf-hunt on wolf numbers, pack sizes, and reproductive potential are  
171 uncertain. Second, little information is available about reproduction for our study period. Wolf  
172 reproduction data is generally difficult to collect and the state census method used tends to  
173 confound pack size with past reproduction [46, 47]. Third, we could not be confident about the  
174 legal quota when we analyzed data in Fall 2021 nor does anyone know the eventual death toll.  
175 Therefore, our forecasts for 14 April 2022 include estimates of all wolf mortalities even if the  
176 legal quota ends up unfilled. We describe the unprecedented methods of the February 2021  
177 wolf-hunt first because it conditions the remaining uncertainties.

178 The February 2021 wolf hunt killed 218 wolves legally, took place during the mating and  
179 pregnancy season of the wolves, and included pursuit in deep snow by snowmobiles, night-time  
180 hunting, hounds in packs of 6, and relays that allowed a team of hunters to substitute a fresh  
181 pack of hounds; >85% of kills were aided by the use of hounds according to hunter self-report  
182 [22]. Hunters overshot the legal quota by 99 wolves (82%), an event the DNR blamed on  
183 regulations that require 24 h notice to close zones and regulations that allowed hunters in open  
184 zones to delay reporting kills for 24 h even after the state quota was met. Also, the state sold  
185 permits for 13 hunters for every wolf that could be legally killed. These latter regulations  
186 increase the uncertainty about the eventual death toll of any legal quota [22, 23, 25, 48].

187 Before we address the remaining uncertainties about population status in our study  
188 period, with a mix of qualitative and quantitative information, we explain the simple model we

189 adopted for population change during the study period. Because of the preceding three  
190 scientific uncertainties and our desire to provide a method that others can use to plug in their  
191 own values or future data, we relied on a simple one-step model of population size change for  
192 our study period, as follows:

$$193 \quad N_{t+1} = N_t + R_t - M_t - H \quad (1)$$

194 where  $N_t$  is the population size estimate on 15 April of year  $t$ ,  $t=2021$ ,  $R_t$  is the number of pups  
195 born in year  $t$  surviving to November when they are typically counted alongside adults using  
196 standard census methods [35, 49],  $H$  is the death toll in a wolf-hunt, and  $M_t$  is the number of  
197 dead wolves in year  $t$ . We estimated  $R_t$  by equation 2,

$$198 \quad R_t = B_t * L * S \quad (2)$$

199 where  $B_t$  is the number of breeding packs,  $L$  is the litter size, and  $S$  is pup survival. We estimated  
200  $M_t$  by Eq. 3,

$$201 \quad M_t = D * (N_t + R_t / 2) \quad (3)$$

202 where  $D$  is the annual mortality rate estimate for a year without ESA protections and without a  
203 wolf-hunt as we describe further below in the section on deaths. Note that  $R$  from Eq.1-3  
204 represents pups surviving to November 2021. In Eq. 3 these pups are exposed to one-half of a  
205 year of  $D$  from November-April.

206 Our simple model in Eq. 1 assumes no net migration into or out of the state during the  
207 study period at a rate relative to deaths or births substantial enough to affect our results.  
208 Assuming no net migration is a precaution because it would be hopeful to imagine rescue from  
209 outside the state if legal thresholds were crossed in the state. Our assumption seems  
210 reasonable given long-distance migration leading to pack establishment has been rare [50].

211 Also, the assumption of no net migration has been used by others modeling this population [51,  
212 52]. Also, Eqs. 1-3 assume linear effects. We assumed no compensatory increases in birth or  
213 pup survival other than those encompassed by the range of values in [53]. We do not ignore  
214 Allee effects, compensation or negative density-dependence [54, 58, 59], but we do not model  
215 them because too many questions remain for Wisconsin wolves [3, 41, 43]. Nor do we model  
216 non-linear effects that would caution against high death tolls in a second wolf-hunt. For  
217 example, depensatory or super-additive effects as described by numerous studies of wolves  
218 including in the Wisconsin wolf population [33, 36, 45, 60, 61]. We defend the simplicity of our  
219 approach as follows: pending evidence that non-linear effects would play out detectably in the  
220 short period of our study and pending an analysis of net compensatory and depensatory  
221 effects, we simply assume the good conditions studied by [56] encompass any nonlinear effects  
222 for wolves in an environment with fewer competitors than before.

## 223 **Population size estimation**

224 The second source of uncertainty described above was the point estimate and precision  
225 of that estimate of population size. The state government had implemented a new,  
226 unpublished method of census (hereafter new census method) which produces systematically  
227 higher estimates than the traditional census method [27, 54, 55]. However, the unprecedented  
228 February hunt described above, interrupted that census. Ending wolf census on 21 February has  
229 never been done. The resulting uncertainty about  $N_{2021}$  leaves us with two estimates using two  
230 methods.

231 The state estimated  $N_{2020}$  by two methods, following [27]. The old census method  
232 yielded 1034-1057 (uninformative uniform distribution). Used since 1979 with a few changes

233 over time, the traditional method attempted complete enumeration referred to as a minimum  
234 count [56], although efforts to validate that it did not double-count wolves are still lacking. The  
235 second, new census method yielded 1195 (957-1573, unknown distribution) and used an  
236 occupancy framework but the method has still not been published in a peer-reviewed,  
237 transparent manner [24]; S1 Fig 1. Although the two methods differ substantially in uncertainty,  
238 they don't result in very different point estimates for  $N_{2021}$ .

239 The state and [23] estimated  $N_{2021}$  in two ways. We estimated it from the old census  
240 method and estimates of population growth parameters and estimates of annual mortality  
241 rates [23] at 695-751 wolves, which we considered a maximum because of the likelihood of  
242 greater rates of illegal killing given the conditions of that hunt summarized above. The second  
243 estimate of  $N_{2021}$  comes from the state government in summer 2021 and uses the new census  
244 method interrupted at 21 February 2021 [25].

245 The state's justification for interrupting the new census method before 14 April 2021,  
246 when it would have been terminated as in previous years [27], was that the wolf-hunt of 22–24  
247 February made accurate and precise data collection impossible. Therefore, the wolf population  
248 estimate derived from the new census method in 2021 lacked non-hunt mortality from 25  
249 February to 14 April 2021, which is a season of high mortality from winter conditions and illegal  
250 killing historically [39, 57, 58][59]. We are not aware of any effort to correct the new census  
251 method estimate, therefore it seems to be a systematic over-estimate of  $N_{2021}$ . Furthermore,  
252 the state did not provide bounds on  $N_{2021}$  but given the reported value (1195) of  $N_{2021}$  equaled  
253 the central tendency of  $N_{2020}$  (also 1195), we assume here the same bounds minus the 218  
254 wolves killed legally in the February wolf-hunt, hence 977 (739-1355). That value minus some

255 unaccounted late winter mortality would bring the estimate closer to the prior estimate of 695-  
256 751. But the similarity of the two estimates for  $N_{2021}$  is hard to evaluate so we use both  
257 throughout.

## 258 **Reproduction**

259 Eq. 1 required the number of pups surviving to November, which in turn, requires Eq. 2  
260 to produce an estimate of B for the number of breeding packs, L for litter size in mid-summer,  
261 and S, pup survival to November. Because we face a nearly complete absence of information on  
262 wolf pack reproduction in summer 2021 [25, 48], we used a mix of informative priors for L, S,  
263 and the proportion of potentially reproductive pairs that actually bred.

264 We used the only peer-reviewed, published study of reproductive success before  
265 November conducted among Wisconsin wolves [53], which provided estimates for the  
266 proportion of packs producing litters (0.55-0.89, mean 0.72), for L, litter size (3-6, mean 4.8),  
267 and for S, pup survival to 3-9 months 0.05-0.72 with a mean of 0.2, from three separate normal  
268 distributions centered on the means and bounded by the 95% CI around those means. For pup  
269 survival to 3-9 months, we noted the long right tail of the distribution in [53] and adjusted the  
270 normal distribution accordingly. Hence multiplying the three preceding parameters yielded an  
271 average of 0.69 (95% CI 0.15-4.32) pups surviving to November per pack. We estimate the  
272 number of breeding packs, B, to multiply it against in the following section.

273 The study in [53] was conducted during a period with ESA protections and a population  
274 recolonizing vacant range, i.e., reproductive performance in good years measured by [53]. We  
275 did not use another commonly cited summary [56] because it aggregated breeding data at the  
276 end of the wolf-year in April and we needed an estimate for November. Also, we have

277 previously explained why winter estimates of pack size might be confounded with estimates of  
278 breeding at that time [47].

279           Number of breeding packs, B: The proportion of packs that produced pups in summer  
280 was estimated in [53] as a proportion of all packs studied. We had to estimate B from the packs  
281 present in the state multiplied by Thiel's [53] estimate of the proportion producing a litter. For  
282 summer 2021, we assumed that the former was some subset of the total number of breeding  
283 females surviving the February 2021 wolf-hunt. For summer 2020, we used [53] estimates and a  
284 highly informative prior as follows.

285           In April 2020, the state contained 245 packs and tribal reservations held 11 packs [27].  
286 An unknown number were eliminated in the February 2021 wolf-hunt. The state assumed no  
287 disruption to breeding after the February 2021 wolf-hunt [25]. Given the unprecedented nature  
288 of the wolf-hunt, the effects of the February 2021 wolf-hunt on R are uncertain. The number of  
289 packs that produced pups in summer 2021 might have been strongly affected by the February  
290 2021 wolf hunt that took place during the breeding season and used methods (hounds,  
291 snowmobiles, night-time tracking) that might have made breeders more vulnerable than in  
292 prior wolf hunts. Given the urine-marking habits of territorial alphas in snow, the possible  
293 olfactory conspicuousness of reproductively active alphas in February, the use of hounds, some  
294 but not all of our scenarios below treat breeding females as relatively more vulnerable than  
295 pack-mates and more vulnerable than in past years.

296           Reproductive success of wolf packs might drop when humans kill pack members, either  
297 directly through death of breeders or indirectly through stress, loss of adult wolf helpers,  
298 wounding, or other factors caused by people. Although there is high variability in the effect of

299 breeder loss across studies and time of year [60-63], it is clear that breeders killed during the  
300 pregnancy or mating season almost invariably result in reproductive failure of the entire pack,  
301 especially when the alpha female dies. There is less evidence for the effect of removing other  
302 wolves, the effect of the novel methods used in the February 2021 wolf-hunt, or the effect of  
303 poaching on subsequent reproductive success of wolf packs. These data are almost absent for  
304 Wisconsin (but see [61]). Therefore, we estimated the number of breeding packs (B) in several  
305 ways.

306         We have five sources of information that help to parametrize B the variable of number  
307 of breeding packs in summer 2021. First, under beneficent conditions studied by [53], we know  
308 the mean (95% CI) for the proportion of packs that bred was 0.72 (0.55-0.89) during early to  
309 middle colonization under ESA protections during a less politically contentious phase of wolf  
310 policy. It seems inconceivable that a greater proportion of packs could have bred in summer  
311 2021, so 218.05 (0.89 x 245 packs across the state) seems like an appropriate starting point to  
312 deduct packs that failed to breed because of the February 2021 wolf-hunt.

313         The minimum plausible deduction from 218.05 is 51 breeding packs which corresponds  
314 to approximately 0.23 pregnant females per wolf-kill. Below we explain why this is a minimum  
315 plausible deduction from 218.05. A preliminary report from a sample of 22 wolf carcasses  
316 volunteered by hunters from the February 2021 wolf-hunt was necropsied by the Great Lakes  
317 Indian Fish & Wildlife Commission [64]. They reported 65% of adult females and 50% of yearling  
318 females were pregnant in that small, nonrandom sample. Our minimum plausible proportion of  
319 23% is much lower because a larger sample from a different hunt in Fall 2012 in neighboring  
320 Minnesota suggested 0.20-0.25 wolves were females with evidence of past breeding [65]. This

321 hunt was very different (no hounds, no deep snow, no snowmobiles, no nighttime hunting, not  
322 during mating season, etc.). Given the average pack size in our region in late winter is  
323 approximately 4 wolves with a longer right tail (2-12), it would appear somewhat less than a  
324 quarter of pack members would be pregnant females if hunters killed them in proportion to  
325 their presence in the population. Thus deducting 51 wolf packs is one-quarter to one-sixth of  
326 the 218-323 extra deaths we described above. That leaves  $B = 167$  as the maximum plausible  
327 upper bound.

328         The maximum plausible value of  $B$  described above seems a maximum for several  
329 reasons. For one, the Timber Wolf Alliance and Timber Wolf Information Network conducted  
330 summer 2021 howling surveys in portions of the state and estimated that fewer than half of the  
331 packs they encountered responded with pup vocalizations [64] citing court declaration by A.P.  
332 Wydeven. Such howling surveys are somewhat accurate for the detection of pups in  
333 experimental, field tests but are not accurate for counting pack size or pup numbers in those  
334 same tests [66]. Although we cannot extrapolate to the whole state or assume that response to  
335 human howls would continue as in the past, their anecdotal data suggest a scenario with a  
336 lower estimate is also plausible. Also, there are reasons to expect breeding females would have  
337 been selected in greater proportions than their representation. Pregnant or mating female  
338 wolves deposit blood and different hormonal odors in their urine left to mark territorial  
339 boundaries. The large number of hounds used in the February 2021 wolf-hunt with deep snow  
340 might have made breeding females particularly conspicuous. Then we might use the higher  
341 value from Red Cliff instead to estimate that 144 wolf packs failed to reproduce in summer



342 2021, leaving  $B = 74$  as a plausible lower bound. However, we suspect the real value lies  
343 between  $B = 74$ -167.

344 We also used an indirect source of information which came from spatial analysis of kill  
345 locations in February 2021 wolf-hunt to generate two additional scenarios. We assume that  
346 wolf packs that might have encountered hunters or hounds during the February 2021 wolf-hunt  
347 might be disrupted reproductively by stress or deaths of pack-mates. We assumed the maps of  
348 hunted areas and pack areas were accurate, every pack near to a hunted area would potentially  
349 be affected by hunting, and reservation packs and packs outside of hunted counties would be  
350 unaffected by hunting. If the spatial proximity of reported wolf-kills predicts the disruption of  
351 reproduction in the nearest pack, then the two scenarios in Fig 1 provide two more estimates of  
352 the number of breeding packs.

353

354 **Fig 1. Two scenarios for Wisconsin wolf packs affected by wolf-hunt.** (A) 91 breeding packs  
355 scenario: Any wolf kill location self-reported by hunters was extended by the average wolf  
356 territory size (161.3 km<sup>2</sup> according to [28]) and if it overlapped a wolf territory, those wolf packs  
357 were assumed not to have reproduced successfully. (B) 129 breeding packs scenario: Any  
358 hunter-reported wolf-kill location inside a wolf pack territory was assumed to have prevented  
359 that pack from reproducing successfully. To estimate the number of breeding wolf packs for  
360 these two scenarios, we used ArcGIS Desktop 10.7.1 to convert the map of 2020 Wisconsin wolf  
361 pack locations reported in [22], and the February 2021 self-reported wolf harvest location map  
362 from [27] into shapefiles. We then used spatial overlay and geo-rectification to find overlap in

363 territories and self-reported kill locations. The Wisconsin county map was sourced from the  
364 WDNR Open Data Portal (<https://data-wi-dnr.opendata.arcgis.com/>).

365

366 Note our unlikely lower bound of 12 breeding packs emerged from scrutiny of Fig 1  
367 because only one pack lay mainly in a county without reported kills and 11 other packs lay  
368 mainly in tribal reservations where hunting was prohibited [64]. If hunters exert a suppressive  
369 effect on reproduction of wolf packs in a large area, the number of breeding packs would be  
370 estimated by  $B = 91$ . That is equivalent to 0.41 of our unlikely upper bound or the failure of 127  
371 packs to breed. If hunters exert a suppressive effect in a much smaller area, the number of  
372 breeding packs would be estimated by  $B = 129$ .

373 In sum, we found four point estimates of the number of breeding packs that seem  
374 plausible (74, 91, 129, 167) without any additional information to choose between them. In Fig  
375 2, we represent the uninformative uniform distribution between those four values and  
376 implausible, extreme values of 12 and 218.05.

377

378 **Fig 2. Two ways to depict the uncertainty about the number of breeding packs.** We selected  
379 the uniform distribution (A) because we had no evidence to support the normal distribution (B).  
380 Also, the uniform, uninformative distribution allows the data to influence the result rather than  
381 our preconceived notions of what is typical in biological distributions. Similarly, we used a  
382 uniform distribution analogous to A to estimate deaths.

383

384

385

## 386 **Deaths**

387           Eq. 1 requires an estimate of  $M_{2021}$ , the number of dead wolves (composed of adults  
388 year-round and pups after November 2021), which relied on an estimate and variation in the  
389 annual mortality rate ( $D$ ) as an input to Eq. 3. We began by solving Eq. 1 for  $M$  and  $R$  in year  $t =$   
390 2020. Because we knew  $N$  for  $t$  and  $t+1$ , Eq. 1 reduces to a change in population equals births  
391 minus deaths. Also, we had an informative prior  $R_{2020}$  from [53] for a summer with ESA  
392 protections following a winter with no wolf-hunt. Hence, we solved for  $M_{2020}$ , which we used as  
393 an input to Eq. 2 for  $D$ , the range of annual wolf mortality rates for years with those conditions.  
394 Note we did not use multiple prior years to estimate  $D$  because the last 5 years were under  
395 strict ESA protections year-round unlike 2020-2021, nor did we use the years with wolf-hunts  
396 2012-2014 because these lacked one or both of the conditions in February 2021 (hunting with  
397 hounds or deep snow cover during the wolf mating season).

398           We present the estimates of  $D$  in Results but validating these may not be obvious. There  
399 is little scientific consensus on annual mortality rates among Wisconsin wolves. The DNR  
400 provided incomplete and unclear data on deaths of wolves after 31 December 2011 [39-41, 67-  
401 69] and particularly incomplete after 14 April 2012 [24, 25, 48, 54, 55, 70, 71]; S1 Fig 2.

402           To validate the estimate of  $D$ , we had separate published estimates using different  
403 methods for adult wolves from 1979-2012. For collared wolves only, the cumulative incidence  
404 of all endpoints (deaths or disappearances) for collared wolves 365 days after collaring was  
405 0.42-0.52 depending on ESA listing status [39]. That study used time-to-event analyses in a  
406 competing risks framework. By contrast, a cruder estimate using a weighted average of collared

407 and uncollared adult wolves dead as a proportion of the population size at the start of each  
408 wolf-year, which did not take into account time-to-event but considered uncollared wolves,  
409 estimated the rate at 0.18 for radio-collared wolves and 0.47 (SD 0.19 annually) for uncollared  
410 wolves [40]. Similarly, [72] reported higher mortality rates for uncollared Alaskan gray wolves.  
411 See also [73] for another large carnivore in which GPS collars are associated with higher  
412 survival. In 2020, approximately 5% of the wolf population was collared, so the weighted  
413 average annual mortality rate would be 0.46. The third peer-reviewed estimate of mortality  
414 covered the years 1979-2013 which included a wolf-hunt in Fall 2012. However that estimate it  
415 provided of 23.5% annual mortality for radio-collared adults in a time-to-event analysis [58]  
416 seems low. For instance, that study failed to account for several confounding variables and took  
417 unjustified steps in analyses. The unjustified steps were to include a variable for a change in  
418 slope in the year 2004 which is distinguishable only by the methods of analysis of census data  
419 [44, 46]. And there were similar changes in census methods and methods of analysis in 1995,  
420 2001-2003, and 2012, which [58] did not consider. We do not understand why 2004 was special  
421 and they did not explain why. Also, the authors lumped nonhuman causes of death with  
422 unknown causes of death, a step that several analyses have shown to be unjustified because  
423 time-to-event analyses show very different timing in the hazard of nonhuman and unknown  
424 causes [39-41, 59]. Moreover, [58] did not acknowledge that uncollared wolves may have faced  
425 higher rates of mortality, or the multiple, corroborating lines of evidence showing that wolf  
426 survival and wolf population growth declined when ESA protections were lifted 7 times from  
427 2003-2013 [12, 39-41, 51, 74, 75]. Finally, [58] did not account for the changes in incidence

428 of wolf mortality with hound-trainign seasons, deer-hunting seasons, and bear-  
429 hunting seasons, especially elevated during months of snow cover [59]. Therefore, h  
430 [58] is certainly too low given the conditions between 3 November 2020 and 13 April 2021.

431 In sum, we had three published estimates of annual mortality rate from prior years  
432 ranging from 0.235-0.52 using three different methods on similar datasets, with which we could  
433 validate our estimate of  $D$ , at least qualitatively. We used a uniform distribution analogous to  
434 Fig 2 for  $D$ .

## 435 **Scenarios for wolf-hunt death tolls ( $H$ ) and order of operations in our** 436 **model**

437 The last step in our analysis was to subtract  $H$  for the death toll from the uncertain wolf-  
438 hunt scheduled for November 2021. These death tolls assume zero sub-lethal injuries  
439 unreported as legal kills, and assuming zero additional cryptic poaching beyond that already  
440 captured in annual mortality rates during periods without ESA protections [23, 39].

441 Uncertainty about the death toll reflects different permutations of the quota set by the  
442 DNR (130 wolves) and that quota voted by the NRB on 11 August 2021 (300 wolves) in addition  
443 to the following factors that might raise or lower the eventual death toll: over-kill in February  
444 2021 of 99 or 82% might repeat itself; or the tribal treaty right to reserve 43% of the declared  
445 state quota (leaving a death toll of 74 if the DNR quota of 130 were to be implemented).  
446 Therefore, we modeled  $H$  as a continuous, normal distribution with a mean of 300 ranging from  
447 0-600.  $H$  was our perfectly measured  $x$  variable on which to regress the population estimate  
448 using ordinary least squares algorithms. In Results and Discussion, we focus on three  $x$  values

449 (0, 130, and 300) representing the preferred, legal death tolls for the plaintiffs [64, 76], DNR,  
450 and NRB respectively. We also discuss a fourth death toll (74), which was the DNR's 130 death  
451 toll minus the tribal treaty right reserved 43%.

452         Because annual mortality rate is a proportion of living wolves, the order in which we  
453 deduct non-hunt deaths may be important. Subtracting the November wolf-hunt first would  
454 over-count deaths from other causes because these are calculated as a proportion using the  
455 annual mortality rate described above. However, half the year passes before the wolf-hunt and  
456 a smaller number of wolves (adults only) are present to die of such causes, so the number of  
457 deaths would be under-counted, if we deduct the non-hunt mortality first. Ideally, one would  
458 subtract the adult summer mortality, add pups surviving to November, subtract the wolf-hunt  
459 and then subtract adults and pups dying from other causes in the winter. However, we believe  
460 uncertainty about the other parameters described previously is far greater than the slight  
461 difference this more realistic algorithm would create. Therefore, to keep the calculations  
462 simple, we deducted all the annual mortality before the wolf-hunt, which treats the wolf-hunt  
463 as purely additive. The bias we introduce by estimating a higher number of non-hunt deaths is  
464 offset by the bias we have already introduced by dismissing unreported deaths and excess  
465 illegal killing. For example, the most rigorous study of cryptic poaching to date on the  
466 endangered Mexican wolf estimated that disappearances of collared wolves in this closely  
467 monitored population went up 121% when the wolf was not listed under the ESA, compared to  
468 periods of strict ESA protection [38]. However, we took the conservative step of not using this  
469 estimate or the higher mortality rate of collared wolves estimated in [39].

470 Finally, before evaluating legal thresholds, we subtracted 42 wolves living entirely or  
471 mostly on tribal reservations [27], because these are managed by the co-sovereign tribes whose  
472 governments declared wolves protected from public hunts [77].

473 Randomizing: Our modeling procedure used random generation of values for every  
474 parameter in Eqs. 1 and 2 in 1200 iterations repeated once for each census method (traditional  
475 and new). We tripled that for the final estimates of  $N_{2021}$  to 3600 iterations to boot-strap the  
476 distribution around the means. S2 Table provides the randomization outcomes and the  
477 distributions for each parameter. S3 Table provides the code.

## 478 Results

479 Table 1 presents the estimate of annual rate of mortality,  $D$ , which ranged from 0.38-  
480 0.56 when we used the traditional census method or a range from 0.17-0.58, with the most  
481 likely values 0.38-0.48, when we used the new census method. Note these two methods have  
482 different distributions. The former is uniform and the latter is unknown but extremely unlikely  
483 to be uniform. Given the new method has very wide bounds and hence great uncertainty and  
484 lacks peer reviewed validation as of writing, we have elected to view it qualitatively as  
485 consistent with the traditional method because its bounds entirely contain the bounds of the  
486 traditional method, Also, the latter is consistent with recent, peer-reviewed published  
487 estimates of annual mortality rates (see Methods). Therefore, in the next step we take  $D$  to be  
488 0.38-0.56 with a uniform distribution.

489

490 **Table 1. Estimates of the annual mortality rate ( $D_{2020}$ ) of Wisconsin wolves between 15 April**  
491 **2020 and 14 April 2021.** We used two census methods to estimate  $N_{2020}$  and  $N_{2021}$  and

492 reproductive parameter R (mean, lower and upper bounds of the 95% CI from [53] for 256 wolf  
 493 packs. D is estimated as  $(N_{2021}-N_{2020})$  divided by  $(0.5 * R_{2020} + N_{2020})$  following Eq. 3. We assumed  
 494 the mean value for  $N_{2021}$  because the state did so for setting policy.

| <b>Table 1.</b>                                  | <b>Traditional census method<br/>(uniform distribution) estimating<br/><math>D_{2020}</math></b> |           | <b>New census method (unknown<br/>non-uniform distribution)<br/>estimating <math>D_{2020}</math></b> |            |            |
|--------------------------------------------------|--------------------------------------------------------------------------------------------------|-----------|------------------------------------------------------------------------------------------------------|------------|------------|
|                                                  | <b>A*</b>                                                                                        | <b>B*</b> | <b>C**</b>                                                                                           | <b>D**</b> | <b>E**</b> |
| <b>Estimates of<br/><math>D_{2020}</math>***</b> |                                                                                                  |           |                                                                                                      |            |            |
| <b>Mean</b>                                      | 0.41                                                                                             | 0.45      | 0.51                                                                                                 | 0.36       | 0.22       |
| <b>Minimum bound</b>                             | 0.38                                                                                             | 0.43      | 0.50                                                                                                 | 0.34       | 0.17       |
| <b>Maximum bound</b>                             | 0.53                                                                                             | 0.56      | 0.58                                                                                                 | 0.48       | 0.38       |

\* For the traditional census method the minimum bound in 2020 (1034) - the maximum bound in 2021 (751+218) provides the values in column A and the maximum bound in 2020 (1057) - the minimum bound in 2021 (695+218) provides the values in column B.

\*\* For the traditional census method, the state set policy used the mean in 2021 (1195 - 218), so we calculated variation by using the upper bound (1355) in column C, the mean (11995) in column D, and the lower bound (739) in column E.

\*\*\* The mean, minimum bound, and maximum bound reflect the mean and CI of R (see Methods).



496

## 497 **State wolf population $N_{2022}$**

498 Figs 3 and 4 depict the probabilities of crossing legal thresholds for the Wisconsin wolf  
499 population. The slope of Fig 3A suggests that any death toll above 16 creates a better than  
500 average possibility of crossing the threshold of 350 wolves (state population goal). For the new  
501 census method (Fig 3B), that threshold is met at a death toll of 88 but the uncertainty is three  
502 times greater and the risk of crossing lower thresholds also increases. The probability of  
503 crossing the second threshold (state listing) exceeded 50% at death tolls of 113 and 189 wolves,  
504 for the traditional and new census methods respectively. The probability of crossing the third  
505 threshold (state extirpation) exceeded 50% at death tolls of 359 and 443 wolves, for the  
506 traditional and new census methods respectively. The traditional census method had a reliable  
507 slope judged by its r-squared value, twice as reliable as the new census method (Figs 3A and  
508 3B).

509

510 **Fig 3. The relationship between wolf-hunt death tolls in Fall 2021 (x-axis) and predicted wolf**  
511 **population status in Wisconsin on 14 April 2022 (y axis).** Ordinary least squares regression of  
512  $N_{2022}$  against H for the traditional census method (A, regression line not shown adjusted  
513  $r^2=0.89$ ,  $N_{2022} = 366 - 1.016 \cdot H$ , SE slope = 0.010) and new census method (B, regression line not  
514 shown adjusted  $r^2=0.45$ ,  $N_{2022} = 437 - 0.983 \cdot H$ , slope SE = 0.032). We ran 3600 iterations for  
515 each panel, in which we randomly selected 1200 values for each parameter in Eqs. 1 and 2.  
516 Three reference lines represent the legal thresholds of 1 (extirpation, red), 250 (state listing,  
517 orange), and 350 (state population goal, yellow).

518

519

520 **Fig 4. Distributions of predicted population estimates for Wisconsin's wolves on 14 April**

521 **2022.** Frequency distributions assume death tolls of 300 (green), 130 (gray), and 0 (blue)

522 relative to reference lines of extirpation (red), listing (orange), and population goal (yellow). We

523 ran 3600 iterations to generate smoother probability distributions as “shadow grams” made in

524 JMP® 15.0, 2021, for each value of H. These distributions rely on the traditional census method

525 (Fig 3A) and average and SD follow: (green) 61 SD 44 with a 9% chance of extirpation and 100%

526 chance of dropping below the state listing threshold, (gray) 231 SD 45 with a >99.5% chance of

527 dropping below the state population goal and a 64% chance of dropping below the state listing

528 threshold, (blue) 361 SFD 44 with a 13% chance of falling below the state population goal.

529

530 Even a death toll of zero might lead to the wolf population declining below the 1999

531 population goal of 350 (Fig 4). If the new census method were used, the distributions would be

532 flattened raising the probability of undesirable thresholds.

533 The DNR asserted the tribal treaty right to 43% would be respected and the co-

534 sovereign tribes that signed those treaties had asserted they would not hunt those wolves.

535 Therefore, we examine the resulting death toll of 74 next. Using the traditional census method,

536  $N_{2022}$  would average 329 (SD 44) wolves with a 1% probability of crossing the listing threshold of

537 251 and a 65% probability of crossing the state population goal of 350 (orange and yellow lines

538 respectively in Figs 3 and 4). Using the broader, flatter distribution from the new census

539 method,  $N_{2022}$  would average 402 (SD 132) wolves with a 13% probability of crossing the listing

540 threshold of 251 and a 36% probability of crossing the state population goal of 350 (orange and  
541 yellow lines respectively in Figures 3 and 4). The above averages and probabilities assume no  
542 over-kill or illegal kills beyond that estimated by our background mortality rate.

## 543 Conclusions

544 We modeled a population of wolves recently removed from the USA list of endangered  
545 species, subjected to an unprecedented hunting season in February 2021, and proposed for  
546 another hunt in the winter of 2021-2022. We present this case, among other reasons, to  
547 illustrate the use of legal thresholds to define the probabilities that policy will result in  
548 undesirable effects. Societal value judgments have produced legal thresholds that decide what  
549 is precautionary and what is not, relieving scientists of the appearance of making personal  
550 value judgments when evaluating policy effects. We quantified the probabilities of crossing  
551 three legal thresholds with simple models and Bayesian concepts to account for uncertainty.  
552 We demonstrated constructive approaches to using a mix of qualitative and quantitative  
553 information to reduce uncertainty to manageable levels with uninformative, uniformly  
554 distributed prior information. The precautions we studied were set by legal thresholds so we  
555 could operationalize precautionary approaches without interposing our own values. For  
556 organisms at risk of extinction like in our case, precautions are relatively clear because hunting  
557 can only harm the targets, assumptions about resilience should be viewed as risky, and the  
558 sustainability of human actions should be viewed skeptically.

559 Several new results emerged for Wisconsin's wolves. We report high probabilities that a  
560 second wolf-hunt in winter 2021-2022 would drive the Wisconsin wolf population to

561 undesirably low levels, judged by legal thresholds and the current quotas recommended or set  
562 by the state. Moreover, a repetition of the over-kill of the February 2021 wolf-hunt (by 99  
563 wolves or 182% of the legal quota) risks extirpation of the state population leaving only wolves  
564 in tribal reservations. Even a well-regulated wolf-hunt at the quota level recommended by the  
565 state wildlife agency (130) is more likely than not to require statutory listing on the state  
566 endangered and threatened species list. We found any wolf-hunt in November 2021 poses a  
567 measurable risk of an undesirable outcome and any quota >16 wolves is more likely than not to  
568 lead to an April 2022 wolf population below the threshold of the 1999 population goal [43].  
569 Therefore, no wolf-hunt is safe when viewed from a precautionary viewpoint. We also present  
570 the first estimates for annual mortality rate between 15 April 2020 and 14 April 2021. That rate  
571 per year was 0.38-0.56 adults and young of the year that survived to November. If we add the  
572 February 2021 wolf-hunt to the latter rate, the total annual mortality rate in 2021 would rise by  
573 >0.18 (218 / 1195). The sum of those two rates seems unsustainable, even if we accept a  
574 nonhuman-caused rate of mortality of 0.09 [45]. The resulting one-year mortality rate of 0.56-  
575 0.74 in Table 1 is too high to be sustainable by any of the credible estimates in the literature  
576 reviewed by [31]. Also, Table 1 annual mortality rates are substantially higher than the DNR  
577 “consensus” estimate of 13% [23] plus approximately 9% nonhuman-caused. Therefore, we  
578 reject the DNR’s consensus method for estimating mortality as unscientific and highly  
579 inaccurate. Furthermore, the range of annual mortality rates in Table 1 was almost never so low  
580 as estimated by [45]. Their estimate of 23.5% is only plausible for 2020 if one accepts a drastic  
581 rise in population size from 2020 to 2021, which no authority has claimed. As predicted by [36],  
582 the February 2021 wolf-hunt seems to have led to an increase in wolf-killing in response to

583 alleged predation on domestic animals. Also as predicted by [36], reducing protections for  
584 wolves increases calls for legal killing; see also [46]. Reducing protections leads to lower survival  
585 for wolves when all causes of death are considered [36]. Therefore, we recommend the state  
586 halt lethal management of wolves in years it plans wolf-hunts because we see no method or  
587 regulation in place to deduct state lethal control totals from legal quotas. We also recommend  
588 the state revise its estimate of mortality and in so doing also publish all mortality data in a  
589 scientific manner including distinguishing between radio-collared wolves and others with time  
590 on the air for the former. For all governments reporting wolf mortality, we recommend more  
591 care in estimating poaching and the use of forecasting methods that take into account a spike  
592 in legal mortality after governments lower protections for imperiled species [38]. Also we  
593 recommend wolf managers focus on poaching enforcement when seasons for hunting other  
594 (non-wolf) large mammals are open [59]. These recommendations probably apply as well to  
595 other controversial wildlife.

## 596 **Bridging science and policy when both are controversial**

597 Our topic is controversial in wildlife management science and in public policy. Below we  
598 discuss how values in wolf policy affect the handling of precautions and how controversies in  
599 science affect handling of uncertainty. The foundations of the controversies are diverse values  
600 toward wolves in the USA [78, 79], mirrored elsewhere [20, 80]. These publics do not simply  
601 diverge quantitatively in their support of wolves but qualitatively, differing in mutualism values  
602 that favor non-lethal coexistence [81]. Naturally, such public debates affect government  
603 agencies charged with managing wildlife.

604 In the USA, wildlife agencies are typically allied to hunters [82, 83]. Regardless of its origins,  
605 the status quo in all but a few states (California and Colorado currently) that host gray wolves is  
606 towards liberalizing wolf-killing. States such as Wisconsin repeatedly moved towards public,  
607 regulated hunting, trapping, and hounding for the past 23 years [46]. Those values embraced by  
608 the agency push against the above-mentioned shift in public values. State wildlife policies also  
609 clash with scientific evaluations.

610 Several governments' legal wolf-killing quotas exceed levels deemed sustainable by  
611 scientists who cite the agencies for non-transparent handling of uncertainty or data [23, 33, 37,  
612 46]. High quotas for killing large carnivores such as wolves, bears, big cats, have sometimes  
613 been associated with undue political pressures on the agencies. One manifestation of such  
614 political pressures is the tendency for agencies to report unrealistic biological parameters that  
615 appear to the uninformed to support claims that killing is 'sustainable' or 'safe'. Such "political  
616 populations" [30] seem designed to satisfy political demands by inflating population  
617 parameters of the carnivores targeted for killing. A recent review of 666 North American  
618 wildlife hunting plans found a large majority of the plans lacked hallmarks of scientific process  
619 such as setting clear objectives, independent review, and transparency about data or methods  
620 [84, 85]. Regrettably, the Wisconsin wildlife agency got high marks for past management in the  
621 latter review. Our work suggests those high marks were not merited then or now [23, 46]. We  
622 report here that the state of Wisconsin created a political population, by the above definition,  
623 when it set quotas for a second wolf-hunt in one year without data on reproduction or  
624 poaching in the 11 months prior. Such inflation or other distortions of sound science-informed  
625 management seem to surface when agencies are not required by law to use best available

626 science defined by third parties, but rather can pick and choose the evidence they wish to use  
627 based on their personal or organizational values [10, 12, 46, 86-88].

628         The politics that led to the current situation in Wisconsin are complex and go beyond a  
629 pro-wolf and anti-wolf dichotomy. In brief, a state wildlife agency (DNR) under the executive  
630 branch led by the governor appears to be clashing with the commission (NRB) whose members  
631 are appointed by governors but confirmed by the legislative branch. Those two bodies clashed  
632 publicly over wolf policy in August 2021 (<https://www.wpr.org/listen/1836191> , accessed 17  
633 August 2021;[25]). Besides that intra-governmental clash there is a long-standing  
634 intergovernmental dispute between the state and the co-sovereign tribes of the region who  
635 have federal treaty rights to half of almost all natural resource extraction. The state and tribes  
636 have co-managed a subset of resources relatively amicably under federal treaties, but walleye  
637 fish and wolves have been a point of friction for over a decade [77, 89, 90]. The Red Cliff tribal  
638 government and other tribal governments that signed those treaties filed a federal lawsuit on  
639 19 September 2021 alleging treaty rights violations during 2021 wolf-hunt rule-making [64].  
640 Besides being pro-wolf, tribes in our region are also pro-hunting for subsistence, spiritual, and  
641 traditional uses, which represents a distinct set of values in the broader public. Consistent with  
642 the controversial nature of our topic, the Wisconsin wolf-hunt under consideration here is the  
643 subject of lawsuits instate court [76] and federal court [64].

644         The state case led to a temporary injunction barring the sale of permits to hunt wolves  
645 based on the judge's decision that the state wildlife agency acted unconstitutionally [91].  
646 Although legal decisions generally reflect only a court's interpretation of the law, the ongoing  
647 state court case also raises issues of science that concern us here. The state court agreed with

648 plaintiffs on the need to delay the case [92], when the plaintiffs brought to the court's attention  
649 that the state had filed an incomplete administrative record [93]. A complete record of all  
650 comments and other materials submitted to the agency by the public is required by law,  
651 following the Wisconsin Supreme Court decision of Lake Beulah Management District. The  
652 Supreme Court advised the public to "submit evidence to the agency decision makers while  
653 they are deciding what action to take" p.7, [94], so that they can "ensure that information will  
654 be considered by an agency in its decision making and will be included in the record on  
655 review..." p.355, [94]. The plaintiffs identified 59 instances where comments from scientists and  
656 the public were missing from the administrative record under review by the state court [93].  
657 The plaintiffs' implied that the administrative record was preferentially full of gaps that had  
658 been submitted by scientists and scholars critical of the proposed wolf-hunt (p.5 [93]. In sum,  
659 the state wildlife agency in this case has in part created a political population of wolves by  
660 ignoring contradictory scientific evidence and commentary. In our context, the above elements  
661 of controversy about Wisconsin's wolves underline another point about uncertainty and  
662 precaution.

663         When public comments opposing killing policies or otherwise encouraging caution are  
664 dismissed or omitted from the administrative record, the government creates an illusion that its  
665 plans are supported by the public and an illusion that its plans are cautious, because dissenting  
666 voices were silenced. Furthermore, dismissal or omission of scientific evidence that undermines  
667 the government's assertions of fact seem to treat scientific uncertainty as something that can  
668 be willed away through political might. Scientists should speak out against such handling of  
669 scientific information by governments. The above-referenced controversies among publics,



670 within the scientific management community, and between managers and decision-makers  
671 highlight that neither science of uncertainty nor values towards precautionary approaches  
672 alone are at play.

### 673 **Recommendations for scientific management**

674 We recommend scientists account transparently for uncertainty so that decision-makers  
675 can apply precautionary approaches to public policy. Scientific uncertainty often hinders  
676 precautionary approaches. Yet policymakers are often forced to decide anyway. If scientists  
677 turn away from public policy debates characterized by wide gaps in data or great uncertainty,  
678 then decision-makers may decide based on opinion, anecdote, or political pressures. We aimed  
679 to bolster scientists' confidence in their ability to grapple with uncertainty in a way useful to  
680 public policy. We recommend that scientists practice analysis and communication that  
681 improves their ability to explain what the uncertainty means for policy and the public.

682 A common thread running through our work is that the more uninformative the prior data, the  
683 more scenarios one should present and the more transparent the assumptions about inputs  
684 should be. This recommendation aligns with our inclination to use a simple model so that non-  
685 specialist members of the public and decision-makers can easily explore and adjust inputs. Any  
686 reader can follow our lead and estimate the outcomes for any death toll they prefer. Also, we  
687 avoided the critique of precautionary approaches articulated by Curtis (see introduction) by  
688 sticking to peer-reviewed evidence wherever available, evaluating that evidence transparently,  
689 and when unavailable we used uninformative, uniform distributions on priors to account for

690 gaps in important data. Our results speak to how precaution can be operationalized even with  
691 high uncertainty about data.

692         The 82% over-kill seen in <3 days during the February 2021 wolf-hunt has raised  
693 national debate about the security of state wolf populations. That hunt and our calculations  
694 here suggest hunters and poachers can extirpate a relatively small wolf population, in short  
695 order and without poison, which contradicts an unsubstantiated assumption that poison would  
696 be needed to eradicate wolf populations [95]. We expect proponents of that assumption will  
697 claim that the Wisconsin wolf population would persist in tribal reservations, that it would be  
698 rescued by neighboring states, or claim that we were too pessimistic. However, such arguments  
699 miss the point. Anyone who steps away from the precautionary approach must present  
700 stronger evidence for their more optimistic view. The uncertainty grows when one takes  
701 optimistic views because the more extreme higher values produce greater intervals between  
702 minimum and maximum bounds (because we were bounded by zero in this small population of  
703 wolves). Therefore, the burden of proof and demands for data is heavier for those who  
704 advocate for killing.

## 705 Acknowledgments

706 We thank F. J. Santiago-Ávila for comments on the revision.

## 707 References

- 708 1. The United Nations Conference on Environment and Development. Rio declaration on  
709 environment and development. United Nations; 1992.
- 710 2. Wikipedia. Precautionary principle. Wikipedia [Internet]. Accessed 29 January 2022.  
711 Archived: /web/20220129155106/[https://en.wikipedia.org/wiki/Precautionary\\_principle](https://en.wikipedia.org/wiki/Precautionary_principle).
- 712 3. Groom MJ, Meffe GK, Carroll T. Principles of conservation biology, 3rd edition. Sunderland,  
713 MA: Sinauer Associates; 2007.
- 714 4. *Tennessee Valley Authority v Hill*. 1978, U.S. Supreme Court 437 U.S. 153.

- 715 5. Plater ZJB. Endangered species act lessons over 30 years, and the legacy of the snail darter,  
716 a small fish in a pork barrel. *Environmental Law*. 2004;34(2):289-308.
- 717 6. Sullivan PJ, Acheson J, Angermeier PL, Faast T, Flemma J, Jones CM, et al. Defining and  
718 implementing best available science for fisheries and environmental science, policy, and  
719 management. *Fisheries*. 2006;31(9):460-5.
- 720 7. Darpö J. The last say? Comment on cjeus judgement in the tapiola case (c-674/17). *Journal*  
721 *for European Environmental & Planning Law*. 2020;17(1):117-30.
- 722 8. Epstein Y. Governing ecologies: Species protection in overlapping and contiguous legal  
723 regimes: *Acta Universitatis Upsaliensis\_ 91*, Faculty of Sciences, Uppsala; 2013.
- 724 9. Epstein Y, Chapron G. The hunting of strictly protected species: The tapiola case and the  
725 limits of derogation under article 16 of the habitats directive. *European Energy and*  
726 *Environmental Law Review* 2018;June:78-87.
- 727 10. Chapron G, López Bao JV, Kjellander P, Karlsson J. Misuse of scientific data in wolf policy.  
728 *Science*. 2013;339:1521.
- 729 11. Chapron G, Kaczensky P, Linnell JDC, von Arx M, Huber D, Andrén H, et al. Recovery of large  
730 carnivores in europe's modern human-dominated landscapes. *Science*.  
731 2014;346(6216):1517.
- 732 12. Chapron G, Treves A. Reply to comments by olson et al. 2017 and stien 2017. *Proceedings of*  
733 *the Royal Society B*. 2017; 284(1867):20171743.
- 734 13. Epstein Y. Killing wolves to save them? Legal responses to 'tolerance hunting' in the  
735 european union and united states. *RECIEL*. 2017;26(1):19-29.
- 736 14. Epstein Y, Lopez-Bao J, Trouwborst A, Chapron G. Eu court: Science must justify future  
737 hunting. *Science*. 2019;366(6468):961.
- 738 15. Treves A, Bruskotter JT. Gray wolf conservation at a crossroads. *Bioscience*. 2011;61(8):584-  
739 5.
- 740 16. Treves A, Bruskotter JT. Tolerance for predatory wildlife. *Science*. 2014;344(6183):476-7.
- 741 17. Bruskotter JT, Toman E, Enzler SA, Schmid RH. Gray wolves not out of the woods yet.  
742 *Science*. 2010;327:30.
- 743 18. Bruskotter JT, Enzler S, Treves A. Rescuing wolves from politics: Wildlife as a public trust  
744 resource. *Science*. 2011;333(6051):1828-9.
- 745 19. Bruskotter JT, Enzler S, Treves A. Response to mech and johns. *Science*. 2012;335(17):795.
- 746 20. Bruskotter JT, Vucetich JA, Enzler S, Treves A, Nelson MP. Removing protections for wolves  
747 and the future of the u.S. *Endangered species act (1973) Conservation Letters*. 2013;7:401-  
748 7.
- 749 21. *Defenders of wildlife, et al. v Haaland*. United States District Court for the Northern District  
750 *Of California 3:21-Cv-344*; 2021.
- 751 22. Johnson RR, Schneider A. Wisconsin wolf season report february 2021. Madison,  
752 Wisconsin2021.
- 753 23. Treves A, Santiago-Ávila FJ, Putrevu K. Quantifying the effects of delisting wolves after the  
754 first state began lethal management. *PeerJ*. 2021; 9: e11666.
- 755 24. WDNR. Presentation by j. Price tack to wolf harvest committee 8 aprl 2021. Madison,  
756 WI2021.

- 757 25. Natural Resources Board. Request approval of the fall 2021 wolf season harvest quota.  
758 Madison, WI: Wisconsin Department of Natural Resources; 80628C59-435D-488C-  
759 841A100DD6D2CDC3 2021.
- 760 26. WDNR. Wisconsin wolf management plan. Madison, WI: Wisconsin Department of Natural  
761 Resources; 1999.
- 762 27. Wiedenhoeft JE, Walter S, Gross M, Kluge N, McNamara S, Stauffer G, et al. Wisconsin gray  
763 wolf monitoring report 15 april 2019 through 14 april 2020. In: MANAGEMENT BOW, editor.  
764 Madison, Wisconsin: Wisconsin Department of Natural Resources; 2020.
- 765 28. USFWS. Post-delisting monitoring plan for the western great lakes distinct population  
766 segment of the gray wolf. Bloomington, MN and Ft. Snelling, MN: U.S. Fish and Wildlife  
767 Service, Twin Cities Field Office and Midwest Region, 2008.
- 768 29. Affiliated Tribes of Northwest Indians, Association on American Indian Affairs, Great Plains  
769 Tribal Chairman's Association, Inter Tribal Council of Arizona, Native Justice Coalition,  
770 Navajo Nation, et al. Letter to secretary d. Haaland et al. Dated 14 september 2021. 2021.
- 771 30. Darimont CT, Paquet PC, Treves A, Artelle KA, Chapron G. Political populations of large  
772 carnivores. *Conserv Biol.* 2018;32(3):747–9.
- 773 31. Curtis A. The power of nightmares. BBC; 2004.
- 774 32. Adams LG, Stephenson RO, Dale BW, Ahgook RT, Demma DJ. Population dynamics and  
775 harvest characteristics of wolves in the central brooks range, alaska *Wildlife Monographs.*  
776 2008;170:1-25.
- 777 33. Creel S, Rotella JJ. Meta-analysis of relationships between human offtake, total mortality  
778 and population dynamics of gray wolves (*canis lupus*). *PLoS ONE.* 2010;5(9):1-7.
- 779 34. Vucetich JA. Appendix: The influence of anthropogenic mortality on wolf population  
780 dynamics with special reference to creel and rotella (2010) and gude et al. (2011) in the final  
781 peer review of four documents amending and clarifying the wyoming gray wolf  
782 management plan. *Federal Register.* 2012;50:78-95.
- 783 35. Fuller TK, Mech LD, Cochrane JF. Wolf population dynamics. In: Mech LD, Boitani L, editors.  
784 *Wolves: Behavior, ecology, and conservation.* Chicago: University of Chicago Press; 2003. p.  
785 161-91.
- 786 36. Gude JA, Mitchell MS, Russell RE, Sime CA, Bangs EE, Mech LD, et al. Wolf population  
787 dynamics in the u.S. Northern rocky mountains are affected by recruitment and human-  
788 caused mortality. *J Wildl Manage.* 2012;76(1):108-18.
- 789 37. Creel S, Becker M, Christianson D, Dröge E, Hammerschlag N, Hayward MW, et al.  
790 Questionable policy for large carnivore hunting. *Science.* 2015;350(6267):1473-5.
- 791 38. Louchouart NX, Santiago-Ávila FJ, Parsons DR, Treves A. Evaluating how lethal management  
792 affects poaching of mexican wolves *Open Science.* 2021;8 (registered report):200330.
- 793 39. Santiago-Ávila FJ, Chappell RJ, Treves A. Liberalizing the killing of endangered wolves was  
794 associated with more disappearances of collared individuals in wisconsin, USA. *Scientific*  
795 *Reports.* 2020;10:13881.
- 796 40. Treves A, Langenberg JA, López-Bao JV, Rabenhorst MF. Gray wolf mortality patterns in  
797 wisconsin from 1979 to 2012. *J Mammal.* 2017;98(1):17-32.
- 798 41. Treves A, Artelle KA, Darimont CT, Parsons DR. Mismeasured mortality: Correcting  
799 estimates of wolf poaching in the united states. *J Mammal.* 2017;98(5):1256–64.

- 800 42. Treves A, Artelle KA, Paquet PC. Differentiating between regulation and hunting as  
801 conservation interventions. *Conservation Biology* 2018;33(2):472–5.
- 802 43. Treves A, Krofel M, Ohrens O, Van Eeden LM. Predator control needs a standard of unbiased  
803 randomized experiments with cross-over design. *Frontiers in Ecology and Evolution*. 2019; 7  
804 402-13.
- 805 44. Treves A. Peer review of the proposed rule and draft biological report for nationwide wolf  
806 delisting. In: Department of Interior USFWS, editor. Washington, D.C.: Department of  
807 Interior, U.S. Fish & Wildlife Service; 2019.
- 808 45. Treves A, Louchouart NX, Santiago-Ávila F. Modelling concerns confound evaluations of  
809 legal wolf-killing. *Biol Conserv*. 2020;<https://doi.org/10.1016/j.biocon.2020.108643>.
- 810 46. Treves A, Paquet PC, Artelle KA, Cornman AM, Krofel M, Darimont CT. Transparency about  
811 values and assertions of fact in natural resource management. *Frontiers in Conservation  
812 Science: Human-Wildlife Dynamics*. 2021;2:e631998.
- 813 47. Wydeven AP, Treves A, Brost B, Wiedenhoef JE. Characteristics of wolf packs in wisconsin:  
814 Identification of traits influencing depredation. In: Fascione N, Delach A, Smith ME, editors.  
815 *People and predators: From conflict to coexistence*. Washington, D. C.: Island Press; 2004. p.  
816 28-50.
- 817 48. Natural Resources Board. Meeting to set fall 2021 wolf hunting quota, 11 august 2021  
818 agenda item 4h. 2021 <https://dnr.wisconsin.gov/About/NRB/2021/10-August> archived at  
819 </web/20220130192152/https://dnr.wisconsin.gov/About/NRB/2021/10-August>.
- 820 49. Fuller TK. Population dynamics of wolves in north central minnesota. *Wildlife Monographs*.  
821 1989;105:3-41.
- 822 50. Treves A, Martin KA, Wiedenhoef JE, Wydeven AP. Dispersal of gray wolves in the great  
823 lakes region. In: Wydeven AP, Van Deelen TR, Heske EJ, editors. *Recovery of gray wolves in  
824 the great lakes region of the united states: An endangered species success story*. New York:  
825 Springer; 2009. p. 191-204.
- 826 51. Chapron G, Treves A. Blood does not buy goodwill: Allowing culling increases poaching of a  
827 large carnivore. *Proceedings of the Royal Society B*. 2016; 283(1830):20152939.
- 828 52. Stenglein JL, Zhu J, Clayton MK, Van Deelen TR. Are the numbers adding up? Exploiting  
829 discrepancies among complementary population models. *Ecology and Evolution*.  
830 2015;5(2):368-76.
- 831 53. Thiel RP, Hall W, Heilhecker E, Wydeven AP. A disjunct gray wolf population in central  
832 wisconsin. In: Wydeven AP, Van Deelen TR, Heske EJ, editors. *Recovery of gray wolves in the  
833 great lakes region of the united states: An endangered species success story*. New York:  
834 Springer; 2009. p. 107-18.
- 835 54. Natural Resources Board. Request that the board take action to consider approval of a  
836 quota for a February 2021 wolf hunt in accordance with the circuit court order issued on  
837 February 11, 2021 in *Hunter Nation et al. v Wisconsin DNR et al.*, 2021cv000031 Document  
838 96 Jefferson County). Madison, Wisconsin Department of Natural Resources, 15 February  
839 2021. Report No.: 3DC01AE6-681A-457C-AD29-0CC96F975FDE.  
840 [https://widnr.widen.net/view/pdf/sbdtbr1v2w/2021-02-2A-Special-meeting-wolf-  
841 quota.pdf?t.download=true&u=ulxjqn](https://widnr.widen.net/view/pdf/sbdtbr1v2w/2021-02-2A-Special-meeting-wolf-quota.pdf?t.download=true&u=ulxjqn)
- 842 55. Natural Resources Board. 15 february 2021 special meeting. 2021. 37 min, transcript of  
843 video available from authors.

- 844 [https://dnrmedia.wi.gov/main/Play/ccb5cf0361c5471e9cbc7c7a898cfc741d?catalog=9da0bb432f](https://dnrmedia.wi.gov/main/Play/ccb5cf0361c5471e9cbc7c7a898cfc741d?catalog=9da0bb432fd448a69d86756192a62f1721)  
845 [d448a69d86756192a62f1721](https://dnrmedia.wi.gov/main/Play/ccb5cf0361c5471e9cbc7c7a898cfc741d?catalog=9da0bb432fd448a69d86756192a62f1721) archived at  
846 [/web/20220130184720/https://dnrmedia.wi.gov/main/Play/ccb5cf0361c5471e9cbc7c7a898cfc741d](https://dnrmedia.wi.gov/main/Play/ccb5cf0361c5471e9cbc7c7a898cfc741d?catalog=9da0bb432fd448a69d86756192a62f1721)  
847 [?catalog=9da0bb432fd448a69d86756192a62f1721](https://dnrmedia.wi.gov/main/Play/ccb5cf0361c5471e9cbc7c7a898cfc741d?catalog=9da0bb432fd448a69d86756192a62f1721)
- 848 56. Wydeven AP, Wiedenhoef J, Schultz RN, Thiel RP, Jurewicz RR, Kohn B, et al. History,  
849 population growth and management of wolves in wisconsin. In: Wydeven AP, Van Deelen  
850 TR, Heske EJ, editors. Recovery of gray wolves in the great lakes region of the united states:  
851 An endangered species success story. New York: Springer; 2009. p. 87-106.
- 852 57. Stenglein JL, Van Deelen TR, Wydeven AP, Mladenoff DJ, Wiedenhoef J, Langenberg JA, et  
853 al. Mortality patterns and detection bias from carcass data: An example from wolf recovery  
854 in wisconsin. *J Wildl Manage.* 2015;7:1173-84.
- 855 58. Stenglein JL, Wydeven AP, Van Deelen TR. Compensatory mortality in a recovering top  
856 carnivore: Wolves in wisconsin, USA (1979–2013). *Oecologia.* 2018;187(1):99–111.
- 857 59. Santiago-Ávila FJ, Treves A. Poaching of protected wolves fluctuated seasonally and with  
858 non-wolf hunting. *Scientific Reports.* 2022.
- 859 60. Borg BL, Brainerd SM, Meier TJ, Prugh LR. Impacts of breeder loss on social structure,  
860 reproduction and population growth in a social canid. *Journal of Animal Ecology*  
861 2015;84(1):177-87.
- 862 61. Brainerd SM, Henrik Andrén, Edward E. Bangs, Elizabeth H. Bradley, Joseph A. Fontaine,  
863 Wayne Hall, et al. The effects of breeder loss on wolves. *Journal of Wildlife Management.*  
864 2008;72(1):89-98.
- 865 62. Bassing SB, Ausband DE, Mitchell MS, Schwartz MK, Nowak JJ, Hale GC, et al. Immigration  
866 does not offset harvest mortality in groups of a cooperatively breeding carnivore. *Anim*  
867 *Conserv.* 2020;23(6):750-61.
- 868 63. Ausband DE. Gray wolf harvest in idaho. *Wildl Soc Bull.* 2016;40(3):500-5.
- 869 64. Red cliff et al. v cole et al.: U.S. District Court Western District Wisconsin 3:21-cv-00597;  
870 2021.
- 871 65. Stark D, Erb J. 2012 minnesota wolf season report. Grand Rapids, MN: Minnesota  
872 Department of Natural Resources, 2013 5 July 2013. Report No.
- 873 66. Palacios V, Font E, García EJ, Svensson L, Llana L, Frank J, et al. Reliability of human  
874 estimates of the presence of pups and the number of wolves vocalizing in chorus howls:  
875 Implications for decision-making processes. *European Journal of Wildlife Research.*  
876 2017;63:59-66.
- 877 67. Treves A, Chapman CA. Conspecific threat, predation avoidance and resource defense:  
878 Implications for grouping in langurs. *Behav Ecol Sociobiol.* 1996;39:43-53.
- 879 68. Treves A, Bergstrom BJ, Parsons D, Paquet PC, Thiel RP. Letter to the usfws describing  
880 concerns about use of the best available science in the state of wisconsin’s post-delisting  
881 monitoring report on gray wolves. <http://faculty.nelson.wisc.edu/treves/> archived at  
882 [/web/20220130193312/http://faculty.nelson.wisc.edu/treves/reports/Letter%20to%20USFWS/2014](https://dnrmedia.wi.gov/main/Play/ccb5cf0361c5471e9cbc7c7a898cfc741d?catalog=9da0bb432fd448a69d86756192a62f1721)  
883 [\\_Letters-to-USFWS.zip](https://dnrmedia.wi.gov/main/Play/ccb5cf0361c5471e9cbc7c7a898cfc741d?catalog=9da0bb432fd448a69d86756192a62f1721) 15 August 2014. Report No.
- 884 69. Treves A, Chapron G, López-Bao JV, Shoemaker C, Goeckner A, Bruskotter JT. Predators and  
885 the public trust. *Biological Reviews.* 2017; 92:248-70.



- 886 70. WDNR. NRB wolf information request: Agenda item 2a –january 22, 2021 special  
887 meeting. In: Resources DoN, editor. Madison, WI 2021  
888 <https://widnr.widen.net/s/vh58xn8lfr/2021-01-2a-additional-information> archived at  
889 </web/20220130184852/https://widnr.widen.net/s/vh58xn8lfr/2021-01-2a-additional-information>
- 890 71. WDNR. Request from legislators to immediately implement a wolf hunting season in jan-feb  
891 2021, with set quotas, application dates, and set number of tags to be issued. In: Resources  
892 WDoN, editor. Madison, WI document 6B6765FA-4A43-4106-8140-012A95D659D7 2021.
- 893 72. Schmidt JH, Johnson DS, Lindberg MS, Adams LG. Estimating demographic parameters using  
894 a combination of known-fate and open n-mixture models. *Ecology*. 2015;56(10):2583–9.
- 895 73. illeret C, Bischof R, Dupont P, Brøseth H, Odden J, Mattisson J. Gps collars have an apparent  
896 positive effect on the survival of a large carnivore. *Biol Lett*. 2021;17(0000).
- 897 74. Chapron G, Treves A. Correction to ‘blood does not buy goodwill: Allowing culling increases  
898 poaching of a large carnivore’. *Proceedings of the Royal Society B*. 2016;Volume  
899 283(1845):20162577.
- 900 75. Chapron G, Treves A. Reply to comment by pepin et al. 2017. *Proceedings of the Royal*  
901 *Society B*. 2017;2016257(1851):20162571.
- 902 76. Great lakes wildlife alliance et al. v Wisconsin DNR and Cole. Circuit Court Dane County,  
903 Wisconsin Case 2021CV002103 Document 5; 2021.
- 904 77. Sanders JD. Wolves, lone and pack: Ojibwe treaty rights and the wisconsin wolf hunt.  
905 *Wisconsin Law Review*. 2013;2013:1263-94.
- 906 78. Manfredo MJ, Teel TL, Berl RE, Bruskotter JT, Kitayama S. Social value shift in favour of  
907 biodiversity conservation in the united states. *Nature Sustainability*. 2021;4:323–30.
- 908 79. Bruskotter JT, Vucetich JA, Slagle KM, Berardo R, Singh AS, Wilson RS. Support for the u.s.  
909 Endangered species act over time and space: Controversial species do not weaken public  
910 support for protective legislation. *Conservation Letters*. 2018;;e12595:1-7.
- 911 80. Dressel S, Sandström C, Ericsson G. A meta-analysis of studies on attitudes toward bears  
912 and wolves across europe 1976–2012. *Conserv Biol*. 2014;29(2):568-74.
- 913 81. Manfredo MJ, Teel TL, Don Carlos AW, Sullivan L, Bright AD, Dietsch AM, et al. The changing  
914 sociocultural context of wildlife conservation. *Conserv Biol*. 2020.
- 915 82. Gill RB. The wildlife professional subculture: The case of the crazy aunt. *Human Dimensions*  
916 *of Wildlife*. 1996;1(1):60-9.
- 917 83. Clark SG, Milloy C. The north american model of wildlife conservation: An analysis of  
918 challenges and adaptive options. In: Clark SG, Rutherford MB, editors. *Large carnivore*  
919 *conservation: Integrating science and policy in the north american west*. Chicago: The  
920 University of Chicago Press; 2014. p. 289-324.
- 921 84. Artelle KA, Reynolds JD, A. T, Walsh JC, Paquet PC, Darimont CT. Hallmarks of science  
922 missing from North American wildlife management. *Science Advances* 2018;4(3):eaao0167.
- 923 85. Artelle KA, Reynolds JD, A. T, Walsh JC, C. PP, Darimont CT. Distinguishing science from “fact  
924 by assertion” in natural resource management. *Science Advances (eLetter)*.  
925 2018;4(3):eaao0167.
- 926 86. Artelle KA, Anderson SC, Cooper AB, Paquet PC, Reynolds JD, Darimont CT. Confronting  
927 uncertainty in wildlife management: Performance of grizzly bear management. *PLoS ONE*.  
928 2013;8(11):1-9.

- 929 87. Artelle KA, Reynolds JC, Paquet PC, Darimont CT. When science-based management isn't.  
930 Science. 2014;343:1311.
- 931 88. Chapron G, Lopez-Bao J. Conserving carnivores: Politics in play. Science. 2014;343(14):1199-  
932 200.
- 933 89. David P. Ma'iingan and the ojibwe. In: Wydeven AP, Van Deelen TR, Heske EJ, editors.  
934 Recovery of gray wolves in the great lakes region of the united states: An endangered  
935 species success story. New York: Springer; 2009. p. 267-78.
- 936 90. Shelley VS, Treves A, Naughton-Treves L. Attitudes to wolves and wolf policy among ojibwe  
937 tribal members and non-tribal residents of wisconsin's wolf range. Human Dimensions of  
938 Wildlife. 2011;16:397–413.
- 939 91. Great lakes wildlife alliance et al. v Wisconsin DNR and Cole: Order granting petitioners'  
940 motion for temporary injunction. Circuit Court Dane County, Wisconsin Case 2021CV002103  
941 Document 114; 2021.
- 942 92. Great lakes wildlife alliance et al. v Wisconsin DNR and Cole: Petitioners' brief in support of  
943 motion to modify briefing schedule. Circuit Court Dane County, Wisconsin Case  
944 2021CV002103 Document 177; 2022.
- 945 93. Great lakes wildlife alliance et al. v Wisconsin DNR and Cole: rder granting petitioners'  
946 motion for temporary injunction. Circuit Court Dane County, Wisconsin Case 2021CV002103  
947 Document 186; 2022.
- 948 94. Lake beulah management district v Wisconsin DNR. Wisconsin Supreme Court 54 Wis. 2d  
949 47, 799 N.W.2d 73; 2011.
- 950 95. Mech LD. Considerations for developing wolf harvesting regulations in the contiguous  
951 united states J Wildl Manage. 2010;74(7):1421-4.
- 952

## 953 Supporting Information

954 **S1 Figs 1 and 2. Unpublished figures by WDNR staff on 8 April 2021 during a**  
955 **public presentation to the Wolf Harvest Planning Committee.** Fig 1 shows  
956 unpublished results of the new census method. Fig 2 shows how mortality data for April  
957 2020-April 2021 were presented.

958 **S2 Tables. Outputs of randomization for each variable in Eqs. 1-3.** Table headers  
959 describe the distributions used in randomization. Yellow cells are not user-defined but  
960 rather outputs of randomization or outputs of equations. White cells are user-defined so a  
961 user can enter different death tolls (H). These are provided for the purposes of exact  
962 replication of our results. See S2 Table for algorithms.



963 **S3 Table. Algorithms used in randomization and modeling scenarios, showing**  
964 **formulae in Apple Numbers® 2021 v11.2.** Note that the formulae should follow the  
965 insertion of '=' to become active and then should be pasted into all cells within a sheet.  
966

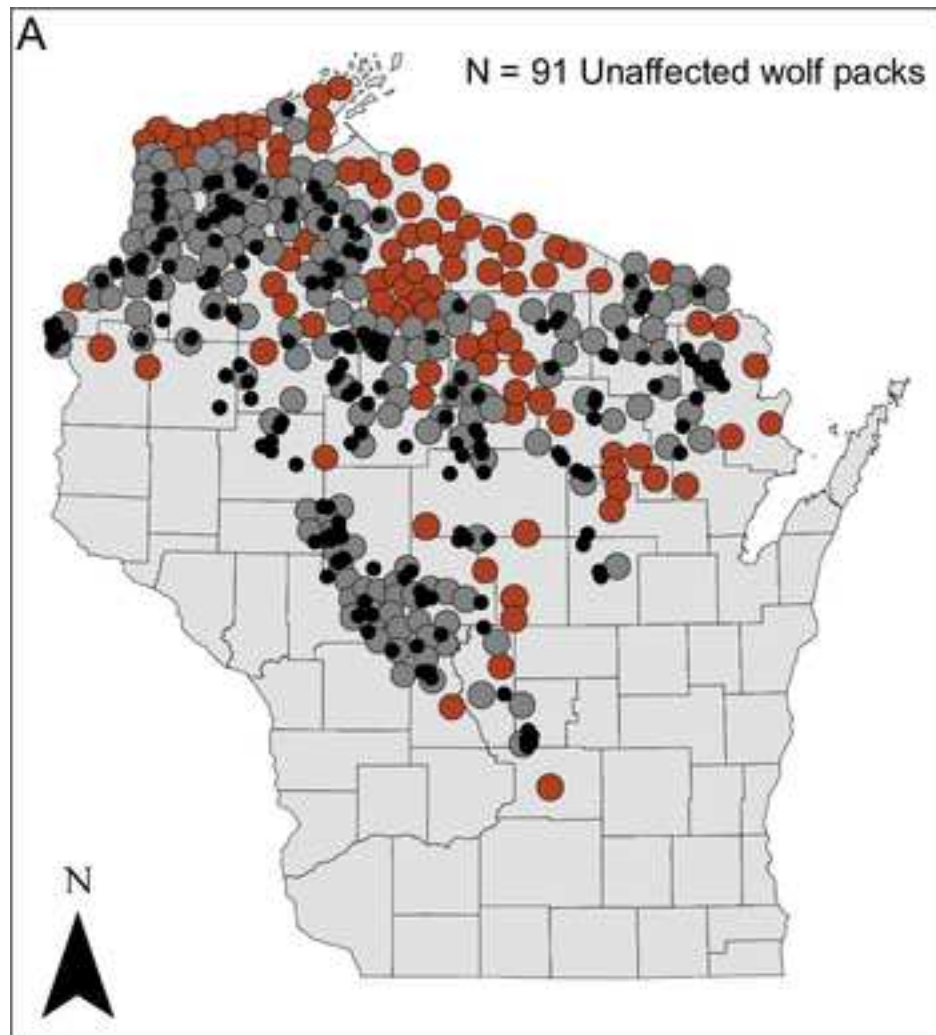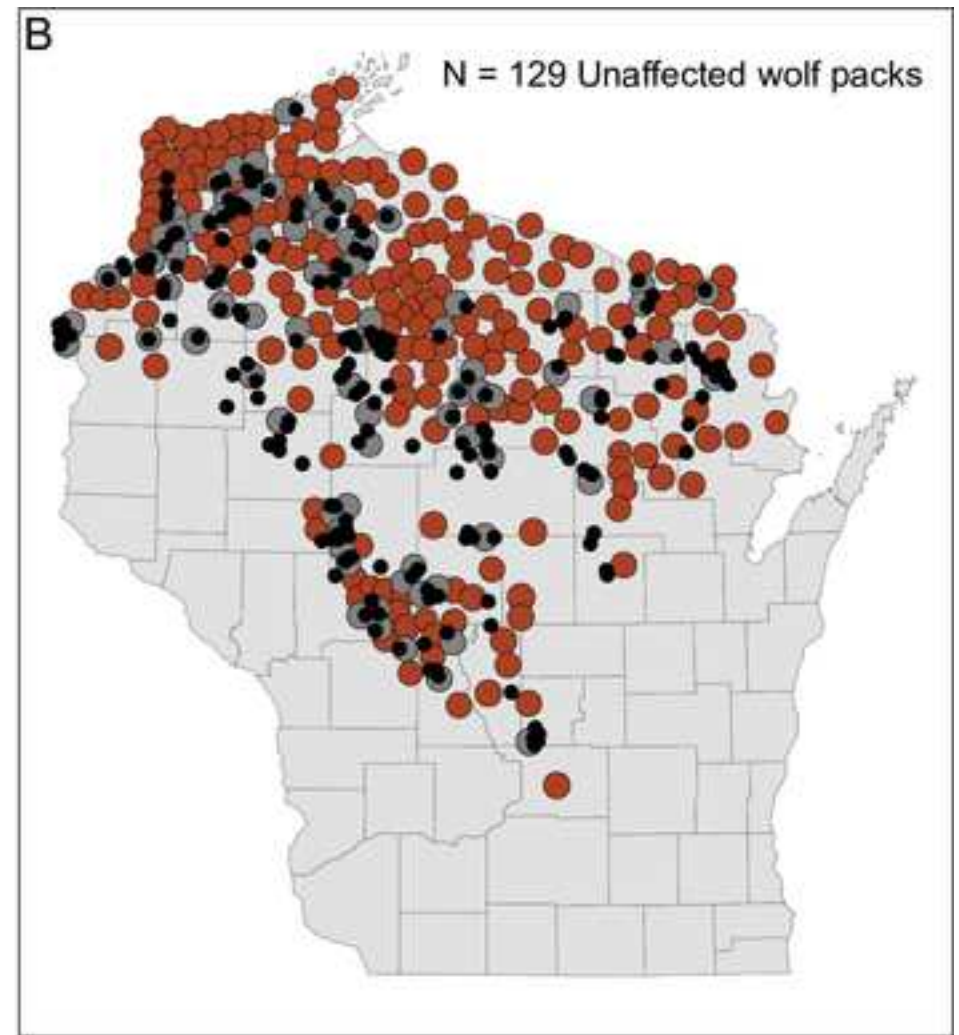

• Self-Reported Wolf Harvest Locations

● Affected Wolf Packs

● Unaffected Wolf Packs

0 35 70 140 Miles

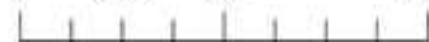

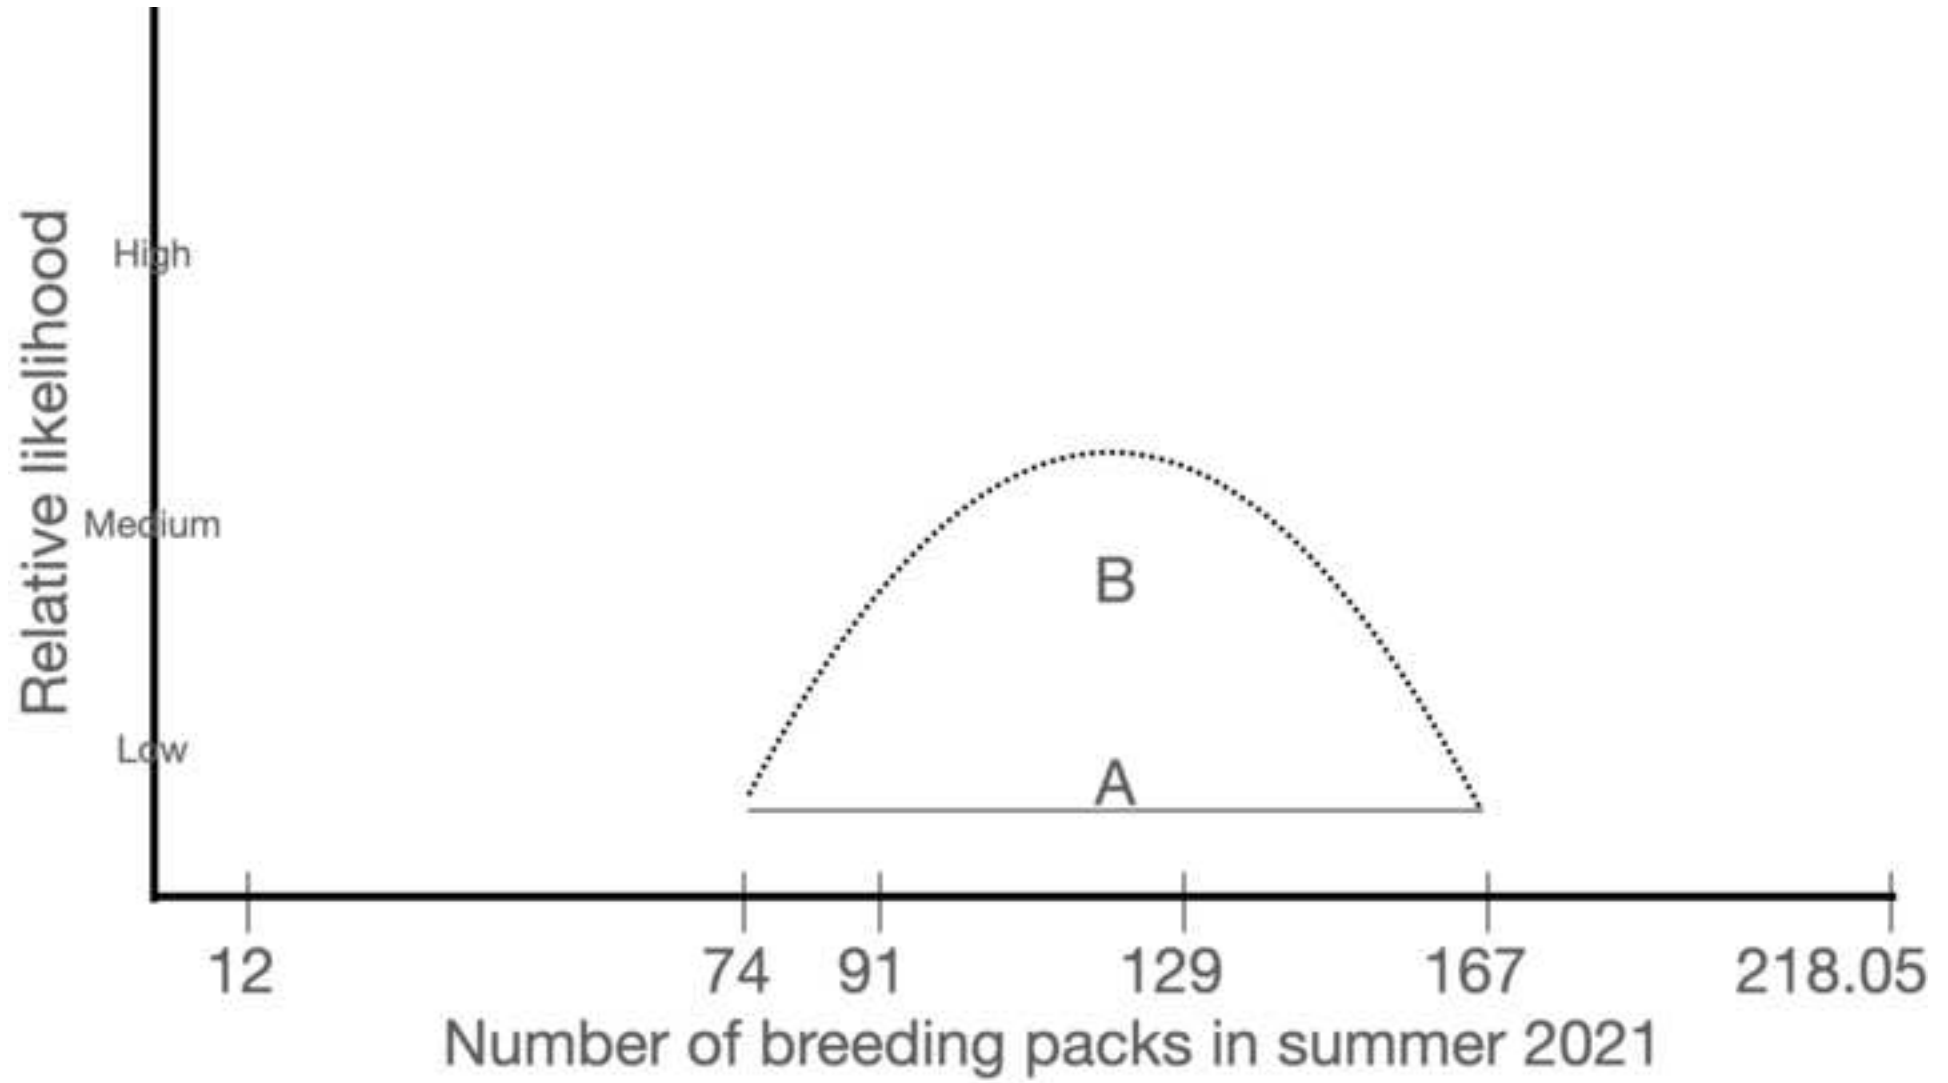

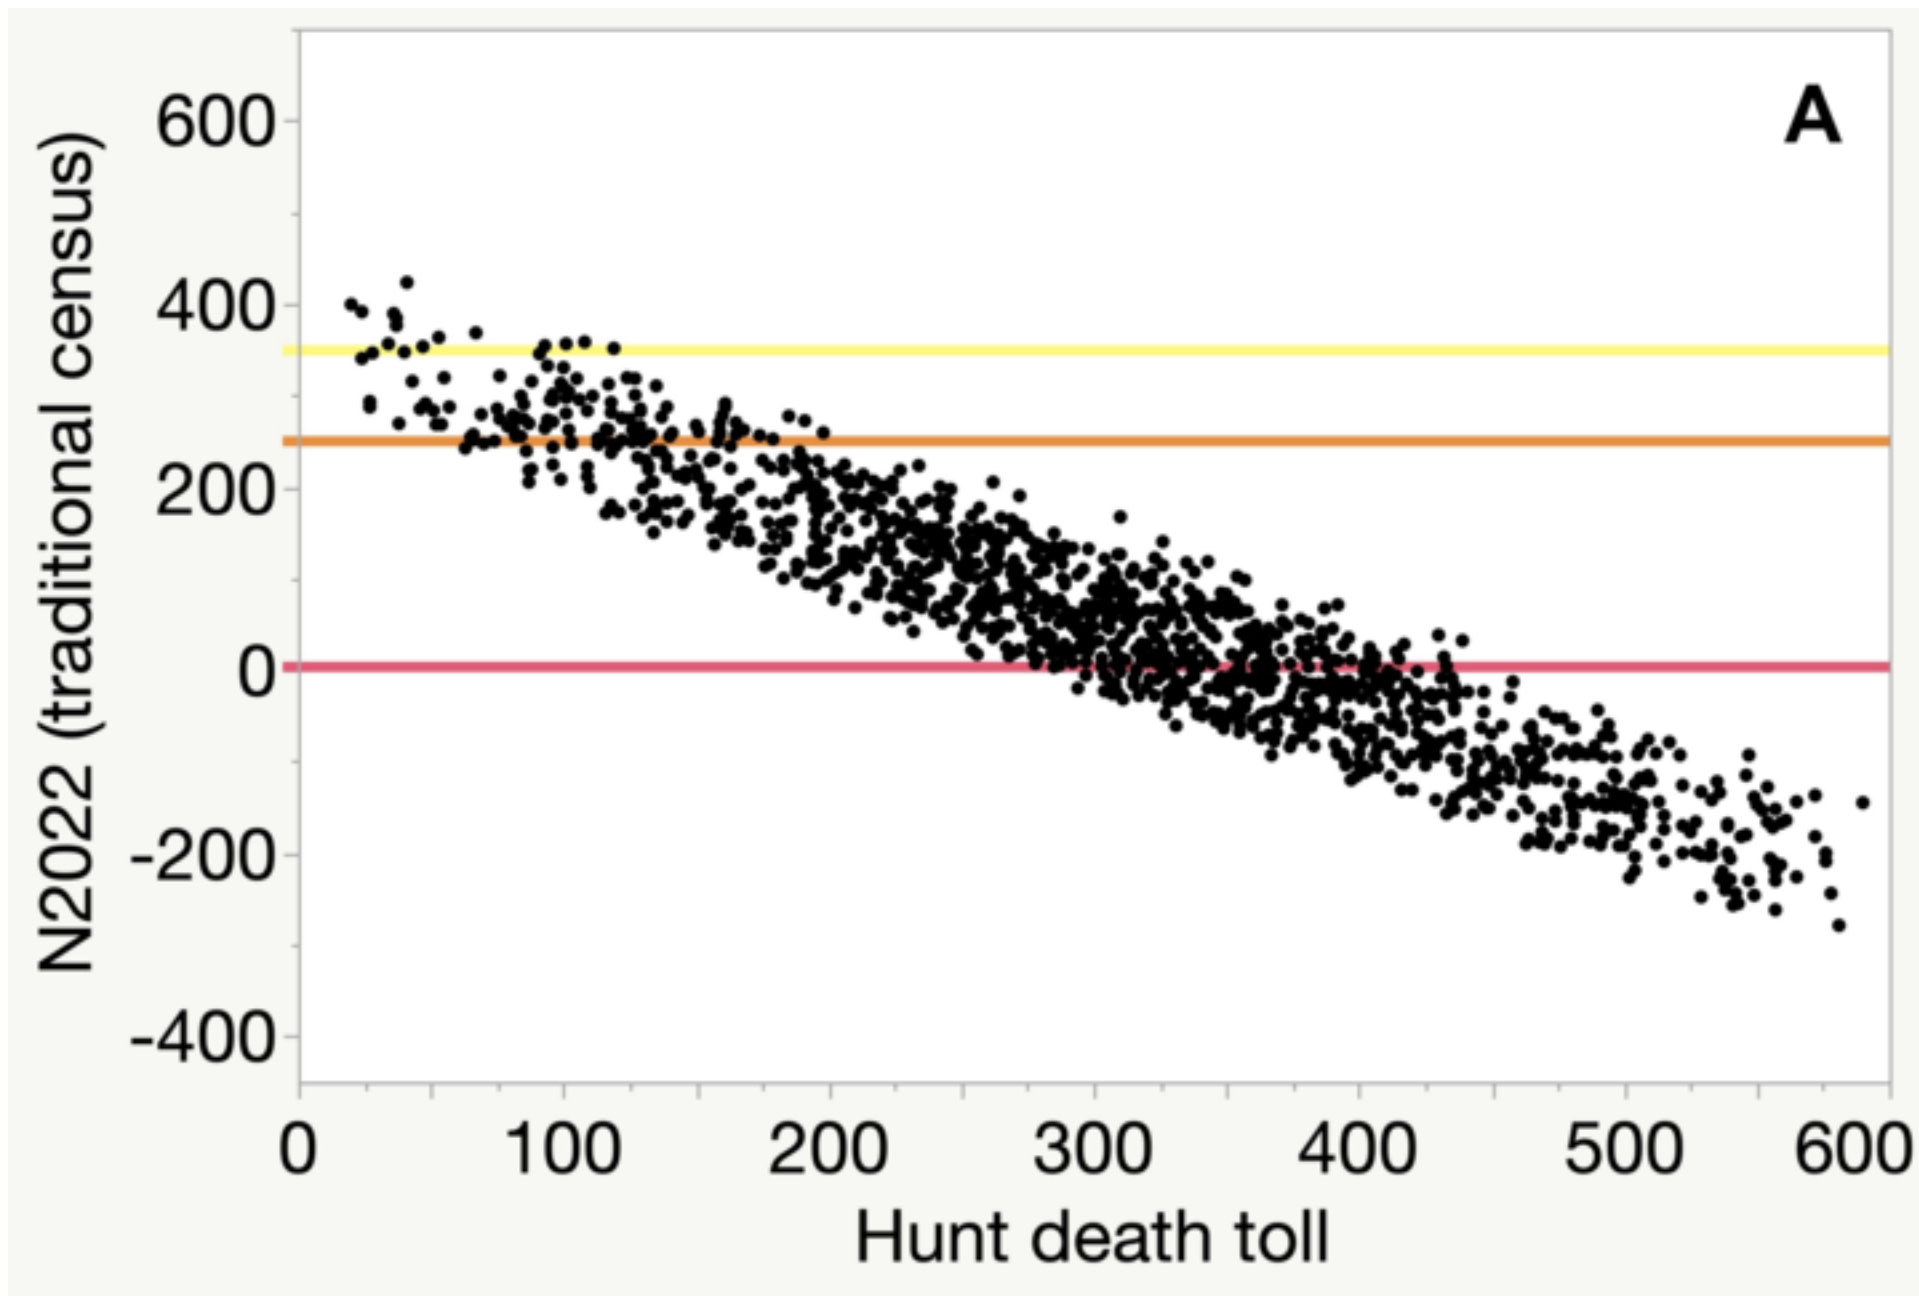

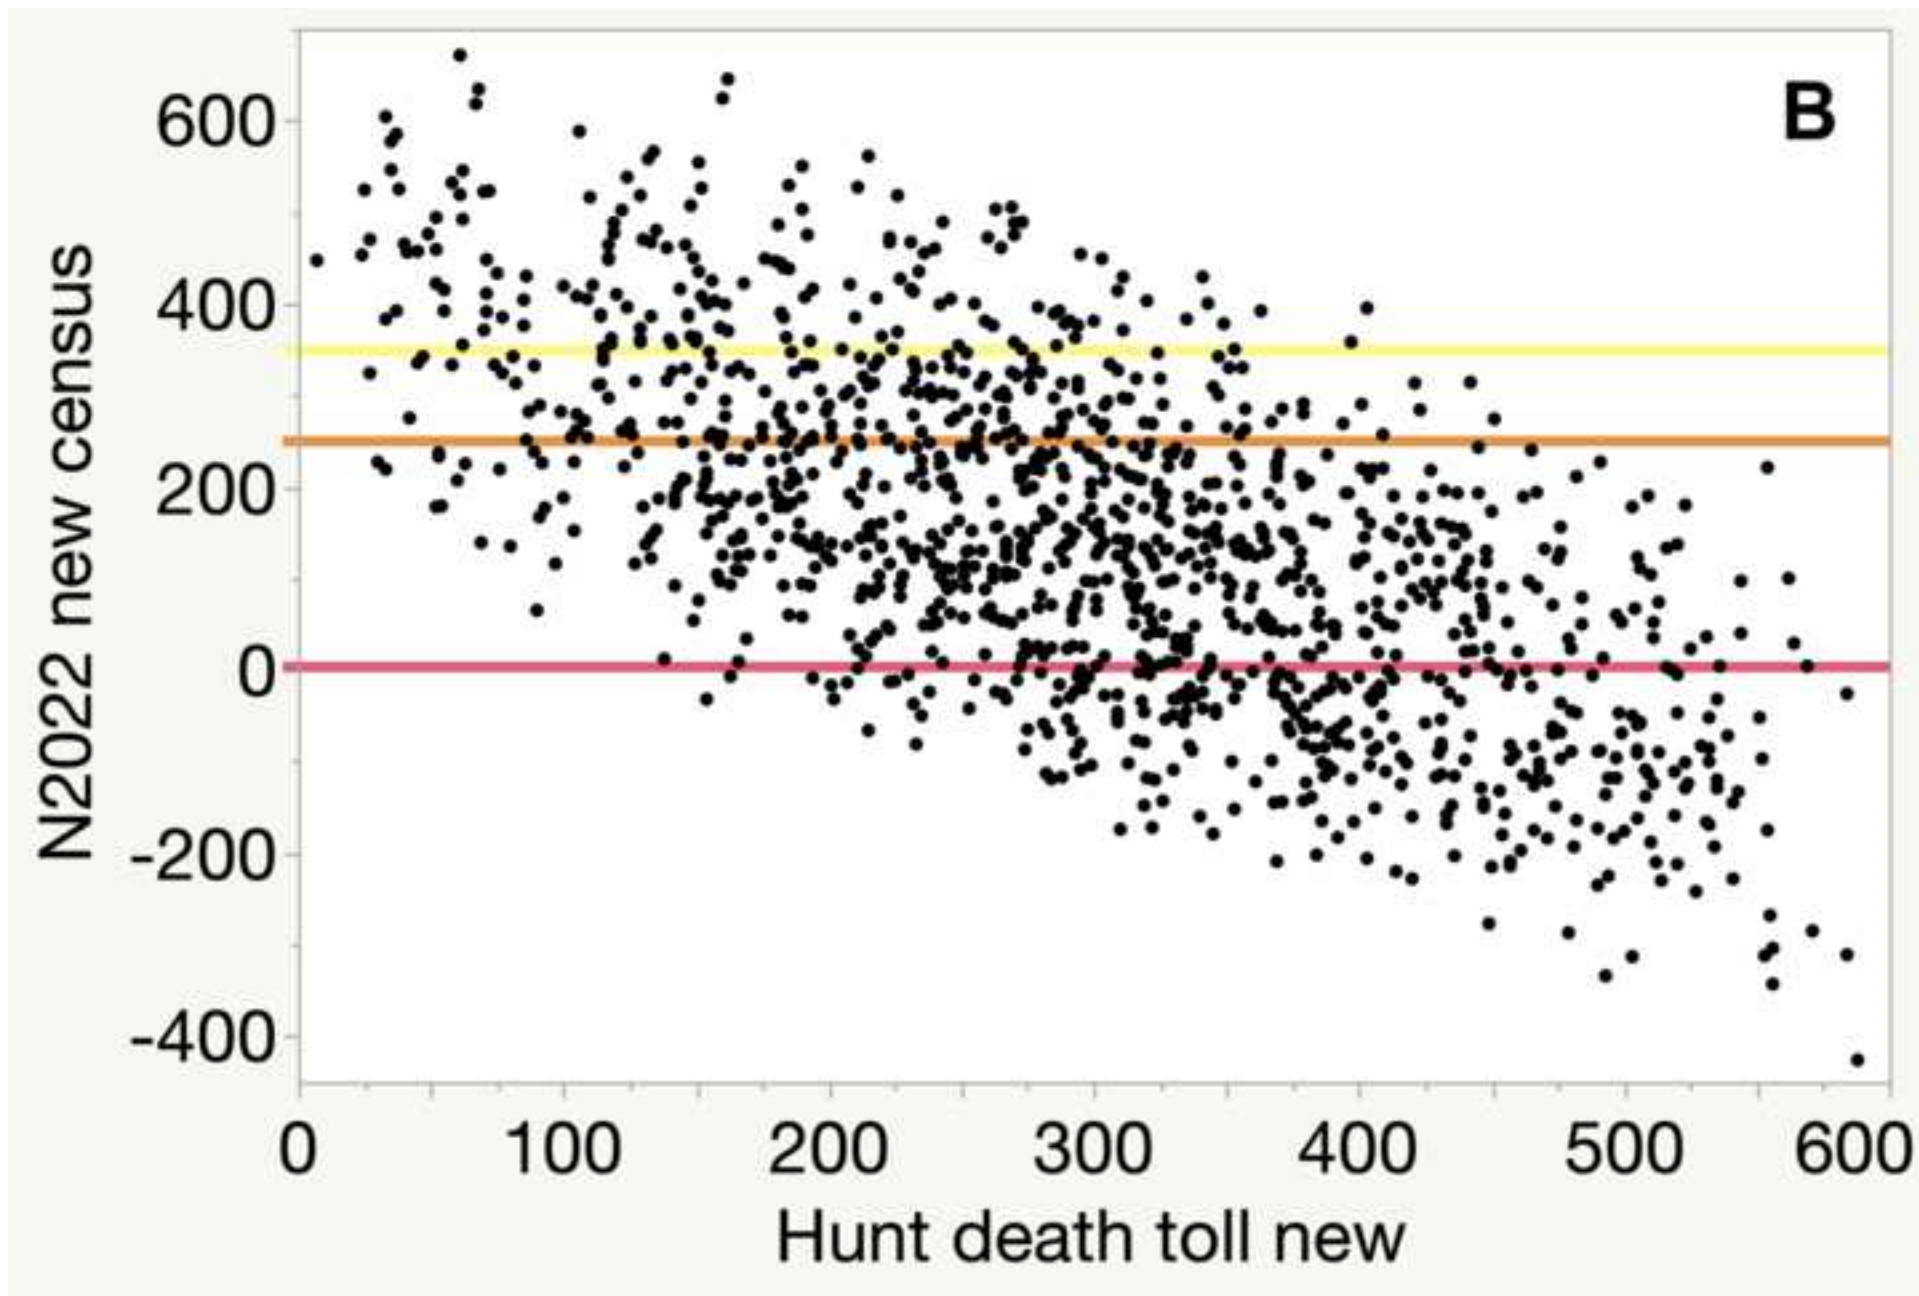



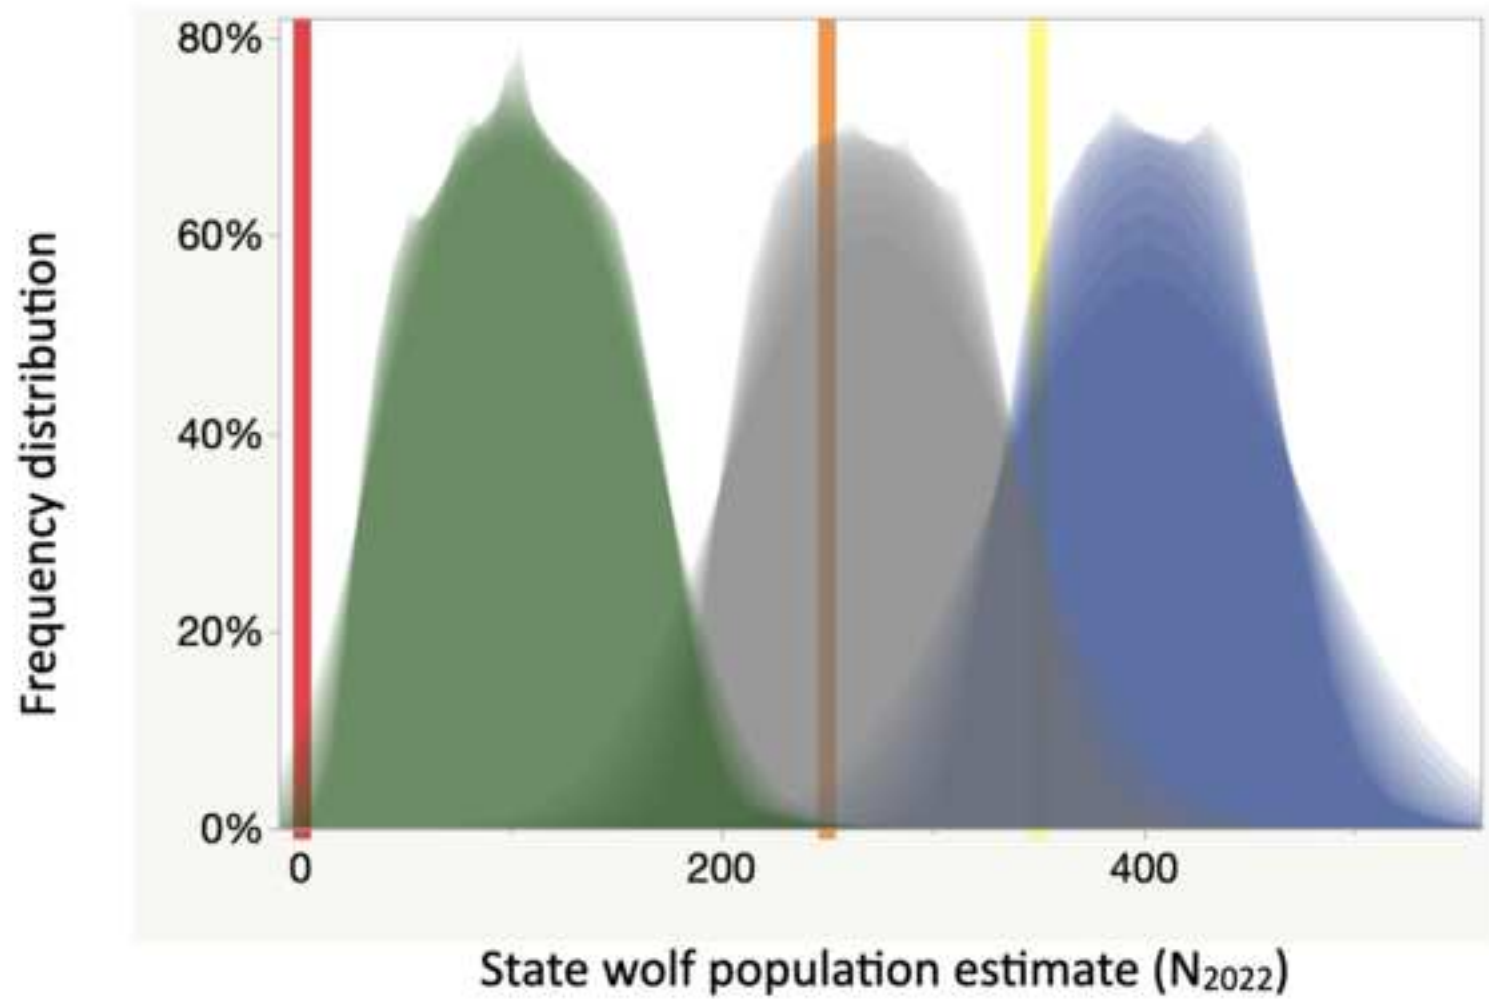

Source: https://www.biorxiv.org/content/10.1101/2021.10.25.465697v3.full.pdf
